# Supplementary material for: Per- and Polyfluoroalkyl Substances in North American School Uniforms
Source: PubMed Central journal article supplement — Environ Sci Technol. 2022 Sep 21;56(19):13845–57. doi: 10.1021/acs.est.2c02111 (PMC9535897; doi:10.1021/acs.est.2c02111), 2022-09-21
Supplement: es2c02111_si_001.pdf [file es2c02111_si_001.pdf]

*Supporting Information*

**Per- and polyfluoroalkyl substances in North American School Uniforms**

Chunjie Xia<sup>1</sup>, Miriam L. Diamond<sup>2,3</sup>, Graham F. Peaslee<sup>4</sup>, Hui Peng<sup>5,3</sup>, Arlene Blum<sup>6</sup>, Zhanyun Wang<sup>7,8</sup>, Anna Shalin<sup>2</sup>, Heather D. Whitehead<sup>9</sup>, Megan Green<sup>4</sup>, Heather Schwartz-Narbonne<sup>2</sup>, Diwen. Yang<sup>5</sup>, Marta Venier<sup>1\*</sup>

1. Paul H. O'Neill School of Public and Environmental Affairs, Indiana University, Bloomington, IN, 47405, USA
2. Department of Earth Sciences, University of Toronto, Toronto, ON, M5S 3B1, Canada
3. School of the Environment, University of Toronto, Toronto, ON, M5S 3E8, Canada
4. Department of Physics and Astronomy, University of Notre Dame, Notre Dame, IN 46556, USA
5. Department of Chemistry, University of Toronto, Toronto, ON, M5S 3H6, Canada
6. Green Science Policy Institute, Berkeley, CA 94709, USA
7. Institute of Environmental Engineering, ETH Zürich, 8093 Zürich, Switzerland
8. Empa – Swiss Federal Laboratories for Materials Science and Technology, Technology and Society Laboratory, CH-9014 St. Gallen, Switzerland
9. Department of Chemistry and Biochemistry, University of Notre Dame, Notre Dame, IN 46556, USA

Number of pages: 48

Number of tables: 23

Number of figures: 5

\* Corresponding author: Marta Venier. Email: [mvenier@indiana.com](mailto:mvenier@indiana.com); Phone: +1-(812) 855-100

## Calibration description for PIGE analysis

**Figure S2** reveals that as material thickness increases, the slope of the standard curve decreased, and the limit of detection increased. This thickness-dependent response was used to develop a standardized approach for determining accurate concentrations of fluorine in textiles where the thickness of each textile standard (from 180-620  $\mu\text{m}$ ) was plotted against its measured slope (**Figure S2**). A linear fit was applied to generate an equation relating measured thickness to a predicted slope. For thicknesses below the minimum and above the maximum thickness used to generate this fit equation (areas where the slope is constant), a single value slope for the material with the closest thickness was used (**Table S3**).

## Substance Flow Analysis (SFA)

Stocks and flows of specific chemicals can be tracked, ultimately providing a better understanding of where to prioritize intervention.<sup>1</sup> We constructed a SFA tracking PFAS originating from intentional use in school uniforms. The proposed model is based on the framework developed by Minet et. al. (submitted)<sup>2</sup> which was used to track PFAS deriving from use in food packaging. We modified that framework by considering uniforms with intentionally added PFAS (concentration  $>0.15\%$  or 1500 ppm see below) and combining together uniforms no PFAS (e.g., not marketed to be stain resistant and ND in Table S1) with low PFAS concentrations ( $<0.15\%$ , see below). Levels of PFAS  $<0.15\%$ , a minimum level recommended to confer water and grease repellency, presumably come from PFAS used as a processing agent or lubricant in the textile production process.<sup>3</sup>

Insufficient information was available to allow us to quantitatively estimate flows except for the use of PFAS in school uniforms purchased in a given year. However, the entire SFA provides insights into intermediate and final sinks of PFAS used in school uniforms.

The flow of total PFAS in children's school uniforms purchased in a given year ( $F_1$ ) was calculated as:

$$F_1 = M_{\text{school uniform}} * (C_{\text{functional}} * \%_{\text{functional}} + C_{\text{no PFAS}} * \%_{\text{no PFAS}}) \quad (1)$$

where  $M_{\text{school uniform}}$  is the mass of children's school uniforms purchased in a given year;  $C_{\text{functional}}$  is the concentration of functional PFAS in school uniforms,  $C_{\text{noPFAS}}$  is the concentration of PFAS in untreated school uniforms,  $\%_{\text{functional}}$  is the percent of school uniforms with functional PFAS, and  $\%_{\text{noPFAS}}$  is the percent of school uniforms with PFAS levels below those conferring functionality. Two versions of  $F_1$  were

calculated: one for polymeric PFAS and one for non-polymeric PFAS. We assumed that these estimates pertained to a single year between 2019 and 2021.

**1) Mass of School Uniforms Purchased.** The mass of children's school uniforms purchased in a given year,  $M_{\text{school uniform}}$ , was defined in equation 2 below, where  $\%_{\text{children}}$  is the percent of school-aged children that wear uniforms; *Population* represents number of school-aged children (5-19 years, which includes elementary, middle and high school); *Number of Items* is the average number of new school uniforms an individual will purchase, per year; *Weight of garment* represents the average weight of a school uniform.

$$M_{\text{school uniform}} = (\%_{\text{children}})(\text{Population})(\text{Number of items})(\text{Weight of garment}) \quad (2)$$

A Coresight Research survey reported that in 2018, 26.1% of American school-aged children wore uniforms to school.<sup>4</sup> This value was used for as both the US and Canadian mid-range estimate for  $\%_{\text{children}}$ , with assumed low and high estimates of 16 and 36%, respectively. We then assumed the number of new school uniform items that an individual would purchase, per year. Assuming that a child would need to purchase at least 1 bottom (pants, skirt, etc.) and 1 top (polo, dress shirt, etc.), the low estimate was set at 2 garments per student per year, where the same set of garments would be worn year-round. We estimated that most students would purchase between 2-3 sets of garments and some may purchase a set for each day of the week, which puts the mid-range estimate at 6 garments and the high-estimate at 10 garments, per year.

Populations of school-aged children between 5-19 years of age for US and Canada were taken from 2020 data from the United Nations Department of Economic and Social Affairs<sup>5</sup> and Statistics Canada,<sup>6</sup> respectively.

Given that the weight of garments for children's school uniforms can be highly variable, depending on the size, material, and type of garment, we calculated an average weight using data from our sample analysis. Twenty-nine unique U.S. and Canadian children's school uniforms were weighed prior to sample manipulation. This included a diverse range of types of school uniforms, including polo shirts, pants and skirts. Additionally, a variety of garment sizes were included, ranging from children's products to pre-teen apparel. The mean garment weight from these data was taken as the middle estimate (166 g), bound by the first quartile weight for low estimate (125 g) and third quartile weight for high estimate (202 g).

**2)  $C_{\text{functional}}$ , Polymeric.** Typical textile finishing agents use copolymers with side-chain fluoropolymers, such as methyl acrylate or perfluoroalkyl acrylate, as active ingredients.<sup>7</sup> These polymers are described as fluoroalkyl chains attached to a polymer back bone.<sup>8</sup> The fluorinated chains are positioned perpendicular to the surface of the fabric and exist in a tight formation, acting as a barrier between oil/water

and the fabric layer.<sup>8</sup> Polymers used in textiles include C4 and C6 short-chain fluorinated polymers, which are used for oil, stain, and water repellency, as well as fluoropolymers such as polytetrafluoroethylene (PFTE), which is commonly used in “breathable” membranes.<sup>9</sup>

We based our estimates on literature recommendations for polymeric fluorochemical deposition on fabric to acquire optimal functionality of stain and water repellency. According to a 3M report on fluorochemical textile repellents, fluorochemical repellency performance is reported to “plateau between 0.3%-0.45% solids fluorine on fabric”, corresponding to roughly 1000-1500 ppm of fluorine on fabric.<sup>10</sup> Other sources suggest fluorochemical deposited on the fabric ranges from 0.15%-0.30% “on the weight of the fabric”,<sup>11</sup> or more generally summarized as <1% “on weight fabric”.<sup>12</sup> We proposed 0.1% as a low range estimate, 0.30% as a mid-range estimate, and 0.45% as a high range estimate for functional polymeric PFAS in textile use, where percent indicates weight of PFAS formulation relative to weight of garment.

We note that the literature mentions (e.g., Choudhury et al. 2017<sup>12</sup>) and our results showed that school uniforms made from cotton had higher levels of PFAS than those made from cotton-synthetic blends. The range of  $C_{\text{functional}}$  chosen for the Substance Flow Analysis brackets the use of PFAS in both cotton and cotton-synthetic blends.

3)  **$C_{\text{functional}}$ , Non-Polymeric.** Non-polymeric PFAS are used in the production of fluoropolymers,<sup>3</sup> but can also form as a result of polymeric PFAS breakdown.<sup>13</sup> The concentration of functional non-polymeric PFAS in school uniforms was estimated using values from the total oxidizable precursor (TOP) assay of 5 school uniforms reported in this study. TOP assay values were converted to percent PFAS using the mass of the material (gram) as for  $C_{\text{functional}}$  polymeric. The first quartile measurement for  $\Sigma_{49}$  PFAS was used as a low estimate (3.52E-03%), followed by the median value used as the mid-range estimate (1.05E-02%), and third quartile measurement used as the high estimate (1.25E-02%) (Table S15). Due to large variety of PFAS species (>4700)<sup>3</sup> and the limited number of commercially available standards (49 species considered in this study), the suggested values for non-polymeric PFAS in school uniforms are likely underestimates. Due to a lack of data, we did not apportion  $C_{\text{functional}}$  according to fabric-type on account of our finding of higher PFAS in cotton versus cotton blend fabrics.

4) **Percent Functional & Percent No PFAS.** The percent of school uniforms with functional PFAS was estimated using equation 3:

$$\%_{\text{functional}} = \%_{\text{SR marketed}} * \%_{\text{SR actual}} \quad (3)$$

where  $\%_{\text{functional}}$  represents the percent of school uniforms with PFAS added for stain resistance;  $\%_{\text{SR marketed}}$  is the percent of school uniforms marketed as stain resistant;  $\%_{\text{SR actual}}$  is the percent of school uniforms

marketed as stain resistant suspected of PFAS treatment, based on PIGE data. In other words, we did not assume that all school uniforms marketed as stain resistant contained PFAS.

%<sub>SR marketed</sub> was estimated using data collected from 5 major retailer websites (both US and Canadian) that were sampled in this study. Under the “uniforms” category of each website, the terms “stain” or “stain-resistant” were used to highlight specific uniforms. We then compared the number of stain-resistant items to the total number of uniforms available on each website. Table S19 lists each major retailer website surveyed and the percent of uniforms available for sale that were marketed as “stain resistant”, %<sub>SR marketed</sub>. The low estimate of 2% was the minimum value reported by retailer #2, the middle estimate of 8% was the median value reported by retailer #5, and the high estimate of 19% was the maximum value reported by retailer #1.

Although items may be marketed as stain resistant, they may be treated with non-fluorinated substances to acquire water, grease and/or dirt repellency.<sup>14, 15</sup> For this reason, we considered the percentage of school uniforms marketed as “stain resistant” that were indicative of PFAS use, based on PIGE data. Of the 30 unique uniforms sampled across US and Canada (excluding field and lab duplicates), 26 were marketed as “stain resistant”. For samples tested on front and back and/or different layers, only the highest total F value of each sample was considered in the calculation. Of the 26 samples, 19 samples had fluorine levels of 1000 ppm or higher, which we assumed was indicative of intentional PFAS use. This equates to ~73% that was used as the middle estimate for %<sub>SR actual</sub>. The middle value was bounded by assumed values of 65% and 85% as low and high estimates, respectively.

The low, mid, and high estimates for %<sub>functional</sub> were 1, 6, and 16%, respectively. For each estimate, the percent of school uniforms with no PFAS was calculated accordingly.

Canadian values were taken as one-tenth of the US values based according to country populations and because no significant differences were found between PFAS concentrations in school uniforms purchased in the US and Canada.

**Table S1** Sample information with PIGE results.

| Sample ID             | Subsam<br>ple ID | Total<br>fluorine,<br>µg F/m <sup>2</sup> | Product<br>Category | Material composition                                          | Country of<br>manufacture |                                  |
|-----------------------|------------------|-------------------------------------------|---------------------|---------------------------------------------------------------|---------------------------|----------------------------------|
| Purchased country: US |                  |                                           |                     |                                                               |                           | Functionality                    |
| UOT-IP-US-1           | 1A               | ND                                        | Bib                 | 60% Cotton, 40% polyester                                     | China                     | Water resistant                  |
|                       | 1B               | ND                                        | Bib                 | 100% Thermoplastic polyurethane                               | China                     | Water resistant                  |
| UOT-IP-US-2           | 2A               | 16000                                     | Bib                 | 100% Polyester                                                | China                     | Stain-resistant, water-resistant |
|                       | 2B               | 12500                                     | Bib                 | 100% Polyester                                                | China                     | Stain-resistant, water-resistant |
| UOT-IP-US-3           | 3                | ND                                        | Bib                 | 100% polyester twill                                          | China                     | Water resistant                  |
| UOT-IP-US-4           | 4A               | 30700                                     | Mittens             | No label                                                      | China                     | Waterproof                       |
|                       | 4B               | ND                                        | Mittens             | No label                                                      | China                     | Waterproof                       |
|                       | 4C               | ND                                        | Mittens             | 100% cotton                                                   | China                     | Waterproof                       |
| UOT-IP-US-5           | 5A               | 25800                                     | Mittens             | 100% polyester                                                | China                     | Waterproof                       |
|                       | 5B               | 42500                                     | Mittens             | 100% polyester                                                | China                     | Waterproof                       |
|                       | 5C               | ND                                        | Mittens             | 100% polyester                                                | China                     | Waterproof                       |
| UOT-IP-US-6           | 6A               | ND                                        | Rainsuit            | 100% polyester for shell and lining, 100% acrylic for coating | Bangladesh                | Water resistant                  |
|                       | 6B               | ND                                        | Rainsuit            | 100% polyester for shell and lining, 100% acrylic for coating | Bangladesh                | Water resistant                  |
|                       | 6C               | ND                                        | Rainsuit            | 100% polyester for shell and lining, 100% acrylic for coating | Bangladesh                | Water resistant                  |
| UOT-IP-US-7           | 7A               | ND                                        | Sweatshirt          | TPU                                                           | USA                       | Stain proof                      |
|                       | 7B               | ND                                        | Sweatshirt          | 100% cotton                                                   | USA                       | Stain proof                      |
|                       | 7C               | ND                                        | Sweatshirt          | 100% cotton                                                   | USA                       | Stain proof                      |
| UOT-IP-US-8           | 8A               | 26000                                     | Shoes               | 100% polyester                                                | China                     | Windproof, water-resistant       |
|                       | 8B               | ND                                        | Shoes               | unknown                                                       | China                     | Windproof, water-resistant       |
|                       | 8C               | 25300                                     | Shoes               | unknown                                                       | China                     | Windproof, water-resistant       |
|                       | 8D               | ND                                        | Shoes               | unknown                                                       | China                     | Windproof, water-resistant       |
| UOT-IP-US-9           | 9                | ND                                        | Shoes               | 100% cotton                                                   | China                     | Waterproof                       |
| UOT-IP-US-10          | 10               | 16000                                     | Stroller Cover      | Nylon (210D)                                                  | China                     | Waterproof                       |
| UOT-IP-US-11          | 11A              | ND                                        | Swim Diaper         | Nylon, elastane, polyester, spandex                           | Vietnam                   | Water resistant lining           |
|                       | 11B              | ND                                        | Swim Diaper         | Nylon, elastane, polyester, spandex                           | Vietnam                   | Water resistant lining           |

|              |     |         |                |                                        |                    |                                                   |
|--------------|-----|---------|----------------|----------------------------------------|--------------------|---------------------------------------------------|
| UOT-IP-US-12 | 12A | 13600   | Swim Diaper    | 100% Polyester                         | China              | Waterproof                                        |
|              | 12B | ND      | Swim Diaper    | 100% Polyester                         | China              | Waterproof                                        |
| UOT-IP-US-13 | 13A | 53600   | Snow suit      | 100% polyester, coating: polyacrylates | Indonesia          | NA                                                |
|              | 13B | ND      | Snow suit      | 35% Cotton, 65% Polyester              | Indonesia          | NA                                                |
| UOT-IP-US-14 | 14A | ND      | Snow suit      | 100% polyester                         | China              | Durable water-repellent, windproof                |
|              | 14B | ND      | Snow suit      | 100% polyester                         | China              | Durable water-repellent, windproof                |
| UOT-IP-US-15 | 15  | 319000  | School Uniform | 50% cotton, 50% polyester              | EI Salvador        | Stain-resistant treatment                         |
| UOT-IP-US-16 | 16  | 222000  | School Uniform | 60% Cotton, 40% Polyester              | China              | Easy-to-care, stain release and wrinkle-resistant |
| UOT-IP-US-17 | 17  | ND      | School Uniform | 60% Cotton, 40% Polyester              | Vietnam            | Easy-to-care, stain release and wrinkle-resistant |
| UOT-IP-US-18 | 18  | ND      | School Uniform | 100% polyester                         | Egypt              | Stain, fade, shrink and pill resistant            |
| UOT-IP-US-19 | 19  | ND      | School Uniform | 67% cotton/30% polyester/3% Lycra      | Dominican Republic | Stain and wrinkle-resistant                       |
| UOT-IP-US-20 | 20  | 2100000 | School Uniform | 97% cotton, 3% spandex                 | Vietnam            | Stain resistant                                   |
| UOT-IP-US-21 | 21  | 954000  | School Uniform | 98% cotton, 2% spandex                 | Indonesia          | Stain resistant                                   |
| UOT-IP-US-22 | 22  | 1040000 | School Uniform | 98% cotton, 2% spandex                 | Bangladesh         | Stain resistant                                   |
| UOT-IP-US-23 | 23  | 696000  | School Uniform | 98% cotton, 2% spandex                 | Bangladesh         | Stain resistant                                   |
| UOT-IP-US-24 | 24  | 984000  | School Uniform | 98% cotton, 2% spandex                 | Bangladesh         | Stain resistant                                   |
| UOT-IP-US-25 | 25  | 2040000 | School Uniform | 100% Cotton                            | Indonesia          | Stain Release                                     |
| UOT-IP-US-26 | 26  | ND      | School Uniform | 60% Cotton, 40% Polyester              | Honduras           | Easy-care stain release, wrinkle resistant        |
| UOT-IP-US-27 | 27  | 103000  | School Uniform | 35% Cotton, 65% Polyester              | Nicaragua          | Easy-care stain release, wrinkle resistant        |
| UOT-IP-US-28 | 28  | 492000  | School Uniform | 100% Cotton                            | Bangladesh         | Stain-resistant                                   |
| UOT-IP-US-29 | 29  | 1010000 | School Uniform | 100% Cotton                            | Bangladesh         | Stain-resistant                                   |

|                                                  |    |         |                |                                                                            |            |                                        |
|--------------------------------------------------|----|---------|----------------|----------------------------------------------------------------------------|------------|----------------------------------------|
| UOT-IP-US-30                                     | 30 | 402000  | School Uniform | 97% cotton, 3% spandex                                                     | Bangladesh | Stain resistant, wrinkle resistant     |
| UOT-IP-US-31                                     | 31 | 1440000 | School Uniform | 97% cotton, 3% spandex                                                     | Indonesia  | Stain resistant, wrinkle resistant     |
| UOT-IP-US-32                                     | 32 | ND      | School Uniform | 100% cotton                                                                | Tanzania   | NA                                     |
| UOT-IP-US-33                                     | 33 | 5020000 | School Uniform | 100% cotton                                                                | Indonesia  | Stain release                          |
| UOT-IP-US-34                                     | 34 | ND      | School Uniform | 60% Cotton, 40% recycled Polyester                                         | Indonesia  | NA                                     |
| UOT-IP-US-35<br>(Lab duplicate for UOT-IP-US-34) | 35 | ND      | School Uniform | 60% Cotton, 40% recycled Polyester                                         | Indonesia  | NA                                     |
| <b>Purchased country: Canada</b>                 |    |         |                |                                                                            |            | Functionality                          |
| UOT-IP-1                                         | 1A | 21300   | Bib            | 100% polyester with TPU coating for waterproofing                          | China      | Waterproof, stain resistant            |
|                                                  | 1B | 17000   | Bib            | 100% polyester with TPU coating for waterproofing                          | China      | Waterproof, stain resistant            |
| UOT-IP-2                                         | 2A | ND      | Bib            | Shell: 80% Cotton, 20% polyester. Lining: Polyurethane                     | China      | Waterproof                             |
|                                                  | 2B | ND      | Bib            | Shell: 80% Cotton, 20% polyester. Lining: Polyurethane                     | China      | Waterproof                             |
| UOT-IP-3                                         | 3A | 19500   | Bib            | 100% Nylon with polyurethane coating                                       | Canada     | Waterproof                             |
|                                                  | 3B | 15800   | Bib            | 100% Nylon with polyurethane coating                                       | Canada     | Waterproof                             |
| UOT-IP-4                                         | 4A | 441000  | School Uniform | 97% Cotton, 3% Spandex                                                     | Vietnam    | Stain resistant                        |
|                                                  | 4B | 439000  | School Uniform | 97% Cotton, 3% Spandex                                                     | Vietnam    | Stain resistant                        |
| UOT-IP-5                                         | 5A | 393000  | School Uniform | 98% Cotton, 2% Spandex                                                     | Indonesia  | Stain resistant                        |
|                                                  | 5B | 609000  | School Uniform | 98% Cotton, 2% Spandex                                                     | Indonesia  | Stain resistant                        |
| UOT-IP-6                                         | 6A | 212000  | School Uniform | 95% Polyester, 5% elastane                                                 | China      | Waterproof, repel oil, stain resistant |
|                                                  | 6B | 181000  | School Uniform | 95% Polyester, 5% elastane                                                 | China      | Waterproof, repel oil, stain resistant |
| UOT-IP-7                                         | 7A | ND      | Miscellaneous  | Outer: 100% laminated polyester. Lining: 70% rayon from bamboo, 30% cotton | Canada     | Waterproof                             |
|                                                  | 7B | ND      | Miscellaneous  | Outer: 100% laminated polyester. Lining: 70% rayon from bamboo, 30% cotton | Canada     | Waterproof                             |

|                                           |     |        |               |                                                                                                   |          |                          |
|-------------------------------------------|-----|--------|---------------|---------------------------------------------------------------------------------------------------|----------|--------------------------|
| UOT-IP-8                                  | 8A  | ND     | Miscellaneous | Top: 80% cotton, 20% polyester. Fill and lining: 100% polyester                                   | Pakistan | Waterproof               |
|                                           | 8B  | ND     | Miscellaneous | Top: 80% cotton, 20% polyester. Fill and lining: 100% polyester                                   | Pakistan | Waterproof               |
| UOT-IP-9                                  | 9A  | ND     | Miscellaneous | Front: 100% polyester. Back: 100% polyurethane. Filling: 100% polyester                           | China    | Waterproof               |
|                                           | 9B  | ND     | Miscellaneous | Front: 100% polyester. Back: 100% polyurethane. Filling: 100% polyester                           | China    | Waterproof               |
| UOT-IP-10<br>(Lab duplicate for UOT-IP-9) | 10A | ND     | Miscellaneous | Front: 100% polyester. Back: 100% polyurethane. Filling: 100% polyester                           | China    | Waterproof               |
|                                           | 10B | ND     | Miscellaneous | Front: 100% polyester. Back: 100% polyurethane. Filling: 100% polyester                           | China    | Waterproof               |
| UOT-IP-11                                 | 11A | 30100  | Shoes         | No label                                                                                          | No label | Waterproof               |
|                                           | 11B | ND     | Shoes         | No label                                                                                          | No label | Waterproof               |
| UOT-IP-12                                 | 12A | ND     | Shoes         | Polyester, ethylene vinyl acetate                                                                 | Cambodia | Waterproof               |
|                                           | 12B | 55600  | Shoes         | Polyester, ethylene vinyl acetate                                                                 | Cambodia | Waterproof               |
|                                           | 12C | ND     | Shoes         | Polyester, ethylene vinyl acetate                                                                 | Cambodia | Waterproof               |
|                                           | 12D | ND     | Shoes         | Polyester, ethylene vinyl acetate                                                                 | Cambodia | Waterproof               |
| UOT-IP-13                                 | 13A | 5190   | Shoes         | No label                                                                                          | China    | NA                       |
|                                           | 13B | ND     | Shoes         | No label                                                                                          | China    | NA                       |
| UOT-IP-14                                 | 14A | 53800  | Mittens       | Outer: 100% nylon. Lining: 100% polyester                                                         | China    | Waterproof               |
| UOT-IP-15                                 | 15A | 11800  | Mittens       | Outer: 100% nylon. Insulation: 100% polyester. Inner lining: 100% polyester                       | Canada   | Waterproof               |
|                                           | 15B | 24900  | Mittens       | Outer: 100% nylon. Insulation: 100% polyester. Inner lining: 100% polyester                       | Canada   | Waterproof               |
| UOT-IP-16                                 | 16A | 18300  | Mittens       | Shell: 100% polyester with polyurethane membrane. Palm: 100% nylon. Fill & lining: 100% polyester | Cambodia | Water repellant          |
|                                           | 16B | 132000 | Mittens       | Shell: 100% polyester with polyurethane membrane. Palm: 100% nylon. Fill & lining: 100% polyester | Cambodia | Water repellant          |
|                                           | 16C | 145000 | Mittens       | Shell: 100% polyester with polyurethane membrane. Palm: 100% nylon. Fill & lining: 100% polyester | Cambodia | Water repellant          |
| UOT-IP-17                                 | 17A | 67200  | Swimwear      | 100% polyester                                                                                    | China    | Waterproof (outer layer) |
|                                           | 17B | ND     | Swimwear      | 100% polyester                                                                                    | China    | Waterproof (outer layer) |
| UOT-IP-18                                 | 18A | ND     | Swimwear      | No label                                                                                          | No label | Waterproof (outer layer) |
|                                           | 18B | ND     | Swimwear      | No label                                                                                          | No label | Waterproof (outer layer) |

|                                               |     |        |          |                                                                                                                                                |          |                               |
|-----------------------------------------------|-----|--------|----------|------------------------------------------------------------------------------------------------------------------------------------------------|----------|-------------------------------|
| UOT-IP-19                                     | 19A | 20300  | Swimwear | Shell: 100% polyester. Back: Polyurethane. Inner layer: 88% biconstituent fiber (80% polyester, 20% nylon), 12% polyester. Lining: 100% cotton | China    | NA                            |
|                                               | 19B | ND     | Swimwear | Shell: 100% polyester. Back: Polyurethane. Inner layer: 88% biconstituent fiber (80% polyester, 20% nylon), 12% polyester. Lining: 100% cotton | China    | NA                            |
| UOT-IP-20<br>(Lab duplicate for UOT-IP-19)    | 20A | 45700  | Swimwear | Shell: 100% polyester. Back: Polyurethane. Inner layer: 88% biconstituent fiber (80% polyester, 20% nylon), 12% polyester. Lining: 100% cotton | China    | NA                            |
|                                               | 20B | ND     | Swimwear | Shell: 100% polyester. Back: Polyurethane. Inner layer: 88% biconstituent fiber (80% polyester, 20% nylon), 12% polyester. Lining: 100% cotton | China    | NA                            |
| UOT-2-IP-1                                    | 1A  | 26100  | Bib      | Shell: 100% polyester with polyurethane coating. Lining: 100% polyester. Pocket: 100% silicone                                                 | China    | Waterproof                    |
|                                               | 1B  | ND     | Bib      | Shell: 100% polyester with polyurethane coating. Lining: 100% polyester. Pocket: 100% silicone                                                 | China    | Waterproof                    |
| UOT-2-IP-2                                    | 2A  | ND     | Bib      | Front: 75% cotton, 25% polyester. Back: 100% polyethylene vinyl acetate                                                                        | China    | Water resistant               |
|                                               | 2B  | ND     | Bib      | Front: 75% cotton, 25% polyester. Back: 100% polyethylene vinyl acetate                                                                        | China    | Water resistant               |
| UOT-2-IP-3                                    | 3A  | 13600  | Hat      | Shell: 100% nylon. Lining: 100% polyester                                                                                                      | Canada   | Water-repellent (outer layer) |
|                                               | 3B  | ND     | Hat      | Shell: 100% nylon. Lining: 100% polyester                                                                                                      | Canada   | Water-repellent (outer layer) |
|                                               | 3C  | ND     | Hat      | Shell: 100% nylon. Lining: 100% polyester                                                                                                      | Canada   | Water-repellent (outer layer) |
| UOT-2-IP-4                                    | 4A  | 24400  | Hat      | 100% polyester                                                                                                                                 | China    | Waterproof                    |
|                                               | 4B  | ND     | Hat      | 100% polyester                                                                                                                                 | China    | Waterproof                    |
| UOT-2-IP-5                                    | 5A  | 12000  | Hat      | 100% nylon with polyurethane coating                                                                                                           | China    | Waterproof                    |
| UOT-2-IP-6                                    | 6A  | ND     | Mittens  | Shell, lining & padding: 100% polyester                                                                                                        | China    | Water-repellent               |
|                                               | 6B  | ND     | Mittens  | Shell, lining & padding: 100% polyester                                                                                                        | China    | Water-repellent               |
|                                               | 6C  | ND     | Mittens  | Shell, lining & padding: 100% polyester                                                                                                        | China    | Water-repellent               |
| UOT-2-IP-7<br>(Field duplicate for UOT-IP-16) | 7A  | 10200  | Mittens  | Shell: 100% polyester with polyurethane membrane. Palm: 100% nylon. Fill & lining: 100% polyester                                              | Cambodia | Water repellent               |
|                                               | 7B  | 21400  | Mittens  | Shell: 100% polyester with polyurethane membrane. Palm: 100% nylon. Fill & lining: 100% polyester                                              | Cambodia | Water repellent               |
|                                               | 7C  | 136000 | Mittens  | Shell: 100% polyester with polyurethane membrane. Palm: 100% nylon. Fill & lining: 100% polyester                                              | Cambodia | Water repellent               |

|                                                       |     |        |                   |                                                                   |            |                             |
|-------------------------------------------------------|-----|--------|-------------------|-------------------------------------------------------------------|------------|-----------------------------|
| UOT-2-IP-8                                            | 8A  | 10800  | Mittens           | Shell, lining & padding: 100% polyester                           | China      | Waterproof                  |
|                                                       | 8B  | 32500  | Mittens           | Shell, lining & padding: 100% polyester                           | China      | Waterproof                  |
|                                                       | 8C  | 24800  | Mittens           | Shell, lining & padding: 100% polyester                           | China      | Waterproof                  |
| UOT-2-IP-9                                            | 9A  | 114000 | Rainsuit          | Shell: 100% polyester. Lining: 100% nylon. Fleece: 100% polyester | Vietnam    | NA                          |
|                                                       | 9B  | ND     | Rainsuit          | Shell: 100% polyester. Lining: 100% nylon. Fleece: 100% polyester | Vietnam    | NA                          |
| UOT-2-IP-10                                           | 10A | 4780   | Rainsuit          | 100% nylon                                                        | China      | Waterproof                  |
|                                                       | 10B | 7450   | Rainsuit          | 100% nylon                                                        | China      | Waterproof                  |
|                                                       | 10C | 6830   | Rainsuit          | 100% nylon                                                        | China      | Waterproof                  |
|                                                       | 10D | 4000   | Rainsuit          | 100% nylon                                                        | China      | Waterproof                  |
| UOT-2-IP-11<br>(Lab duplicate<br>for UOT-2-IP-<br>10) | 11A | 4460   | Rainsuit          | 100% nylon                                                        | China      | Waterproof                  |
|                                                       | 11B | 8400   | Rainsuit          | 100% nylon                                                        | China      | Waterproof                  |
|                                                       | 11C | 7510   | Rainsuit          | 100% nylon                                                        | China      | Waterproof                  |
|                                                       | 11D | 4350   | Rainsuit          | 100% nylon                                                        | China      | Waterproof                  |
| UOT-2-IP-12                                           | 12A | 462000 | School<br>Uniform | 98% cotton, 2% spandex                                            | Bangladesh | Waterproof, stain resistant |
|                                                       | 12B | 555000 | School<br>Uniform | 98% cotton, 2% spandex                                            | Bangladesh | Waterproof, stain resistant |
| UOT-2-IP-13                                           | 13A | 563000 | School<br>Uniform | Shell: 98% cotton, 2% spandex. Lining: 100% cotton                | Bangladesh | Waterproof, stain resistant |
|                                                       | 13B | 7450   | School<br>Uniform | Shell: 98% cotton, 2% spandex. Lining: 100% cotton                | Bangladesh | Waterproof, stain resistant |
|                                                       | 13C | 5380   | School<br>Uniform | Shell: 98% cotton, 2% spandex. Lining: 100% cotton                | Bangladesh | Waterproof, stain resistant |
| UOT-2-IP-14                                           | 14A | ND     | School<br>Uniform | 97% cotton, 3% spandex/elastane                                   | Vietnam    | NA                          |
|                                                       | 14B | ND     | School<br>Uniform | 97% cotton, 3% spandex/elastane                                   | Vietnam    | NA                          |
| UOT-2-IP-15                                           | 15A | ND     | School<br>Uniform | 100% cotton                                                       | India      | NA                          |
|                                                       | 15B | ND     | School<br>Uniform | 100% cotton                                                       | India      | NA                          |
| UOT-2-IP-16                                           | 16A | ND     | School<br>Uniform | 97% cotton, 3% spandex                                            | Bangladesh | NA                          |
|                                                       | 16B | ND     | School<br>Uniform | 97% cotton, 3% spandex                                            | Bangladesh | NA                          |
| UOT-2-IP-17                                           | 17A | ND     | School<br>Uniform | 100% cotton                                                       | India      | Stain resistant             |

|                                                |     |        |                |                                                                                                                 |            |                         |
|------------------------------------------------|-----|--------|----------------|-----------------------------------------------------------------------------------------------------------------|------------|-------------------------|
|                                                | 17B | ND     | School Uniform | 100% cotton                                                                                                     | India      | Stain resistant         |
| UOT-2-IP-18                                    | 18A | ND     | School Uniform | 65% polyester, 35% viscose                                                                                      | Bangladesh | Stain and weatherproof  |
|                                                | 18B | ND     | School Uniform | 65% polyester, 35% viscose                                                                                      | Bangladesh | Stain and weatherproof  |
| UOT-2-IP-19<br>(Field duplicate for UOT-IP-5)  | 19A | 514000 | School Uniform | 98% cotton, 2% spandex/elastane                                                                                 | Indonesia  | Stain resistant         |
|                                                | 19B | 463000 | School Uniform | 98% cotton, 2% spandex/elastane                                                                                 | Indonesia  | Stain resistant         |
| UOT-2-IP-20                                    | 20A | 97200  | Snowsuit       | Shell, filler & lining: 100% polyester. Coating: polyacrylates. Fur: 67% acrylic, 18% modacrylic, 15% polyester | Vietnam    | Water resistant         |
|                                                | 20B | ND     | Snowsuit       | Shell, filler & lining: 100% polyester. Coating: polyacrylates. Fur: 67% acrylic, 18% modacrylic, 15% polyester | Vietnam    | Water resistant         |
| UOT-2-IP-21<br>(Lab duplicate for UOT-2-IP-20) | 21A | 99500  | Snowsuit       | Shell, filler & lining: 100% polyester. Coating: polyacrylates. Fur: 67% acrylic, 18% modacrylic, 15% polyester | Vietnam    | Water resistant         |
|                                                | 21B | ND     | Snowsuit       | Shell, filler & lining: 100% polyester. Coating: polyacrylates. Fur: 67% acrylic, 18% modacrylic, 15% polyester | Vietnam    | Water resistant         |
| UOT-2-IP-22                                    | 22A | 119000 | Snowsuit       | Shell & lining: 100% recycled polyester. Fill: 60% recycled polyester, 40% polyester                            | China      | Durable water repellent |
|                                                | 22B | 67500  | Snowsuit       | Shell & lining: 100% recycled polyester. Fill: 60% recycled polyester, 40% polyester                            | China      | Durable water repellent |
| UOT-2-IP-23                                    | 23A | 16200  | Stroller Cover | No label                                                                                                        | China      | Waterproof              |
|                                                | 23B | 14100  | Stroller Cover | No label                                                                                                        | China      | Waterproof              |
| UOT-2-IP-24                                    | 24A | 15100  | Stroller Cover | No label                                                                                                        | No label   | Waterproof              |
|                                                | 24B | 14800  | Stroller Cover | No label                                                                                                        | No label   | Waterproof              |

**Table S2.** Details of Fabrics and paper selected for total Fluorine analysis by PIGE.

| Material Type               | Material Composition      | Thickness (μm) | Area <sub>2</sub> (cm <sup>2</sup> ) | Volume (μL) | Slope of μg F/mL curve | Slope of μg F/cm <sup>2</sup> curve | Precision (RSD) | Accuracy (% Difference) |
|-----------------------------|---------------------------|----------------|--------------------------------------|-------------|------------------------|-------------------------------------|-----------------|-------------------------|
| Whatman 1 Filter Paper      | 100% Cellulose            | 180            | 14.2                                 | 300         | 14.9                   | 1555                                | 19%             | 30%                     |
| Cotton Broadcloth           | 100% Cotton               | 370            | 4                                    | 80          | 5.7                    | 634                                 | 10%             | 2%                      |
| Cotton Polyester Broadcloth | 60% Cotton, 40% Polyester | 450            | 4                                    | 80          | 4.4                    | 492                                 | -               | -                       |
| Matte Milliskin Tricot      | 80% Nylon, 20% Spandex    | 620            | 4                                    | 190         | 2.7                    | 95                                  | 6%              | 4%                      |
| Scuba Double Knit           | 100% Polyester            | 950            | 4                                    | 250         | 3.5                    | 123                                 | 6%              | 2%                      |

**Table S3.** Values and equations used to determine a predicted slope (in units of μg F/cm<sup>2</sup>) based on the thickness of the material being measured.

| Thickness (μm) | Slope value or equation (μg F/cm <sup>2</sup> ) |
|----------------|-------------------------------------------------|
| 0-370          | 1555                                            |
| 370-620        | y = -3.3 + 2027                                 |
| 620+           | 109                                             |

**Table S4.** List of PFAS analytes including abbreviation, CAS number and full name. SS and IS represent surrogate and internal standard, respectively.

| Abbr.         | CAS #       | Compound name                                                           |
|---------------|-------------|-------------------------------------------------------------------------|
| PFPrA         | 422-64-0    | Perfluoropropanoic acid                                                 |
| PFBA          | 375-22-4    | Perfluorobutanoic acid                                                  |
| PFPeA         | 2706-90-3   | Perfluoropentanoic acid                                                 |
| PFHxA         | 307-24-4    | Perfluoro-n-hexanoic acid                                               |
| PFHpA         | 375-85-9    | Perfluoro-n-heptanoic acid                                              |
| PFOA          | 335-67-1    | Perfluoro-n-octanoic acid                                               |
| PFNA          | 375-95-1    | Perfluoro-n-nonanoic acid                                               |
| PFDA          | 335-76-2    | Perfluoro-n-decanoic acid                                               |
| PFUnDA        | 2058-94-8   | Perfluoro-n-undecanoic acid                                             |
| PFDoDA        | 307-55-1    | Perfluoro-n-dodecanoic acid                                             |
| PFTTrDA       | 72629-94-8  | Perfluoro-n-tridecanoic acid                                            |
| PFTeDA        | 376-06-7    | Perfluoro-n-tetradecanoic acid                                          |
| PFHxDA        | 67905-19-5  | Perfluoro-n-hexadecanoic acid                                           |
| PFPrS         | 423-41-6    | Perfluoro-1-propanesulfonic acid                                        |
| PFBS          | 375-73-5    | Perfluoro-1-butanefulfonic acid                                         |
| PFPeS         | 2706-91-4   | Perfluoro-1-pentanesulfonic acid                                        |
| PFHxS         | 355-46-4    | Perfluoro-1-hexanesulfonic acid                                         |
| PFHpS         | 375-92-8    | Perfluoro-1-heptanesulfonic acid                                        |
| PFOS          | 1763-23-1   | Perfluoro-1-octanesulfonic acid                                         |
| PFNS          | 68259-12-1  | Perfluoro-1-nonanesulfonic acid                                         |
| PFDS          | 335-77-3    | Perfluoro-1-decanesulfonic acid                                         |
| PFECHS        | 646-83-3    | Perfluoro-4-ethylcyclohexanesulfonic acid                               |
| Cl-PFOS       | 777011-38-8 | 8-Chloroperfluoro-1-octanesulfonic acid                                 |
| FBSA          | 30334-69-1  | Perfluoro-1-butanefulfonamide                                           |
| FHxSA         | 41997-13-1  | Perfluoro-1-hexanesulfonamide                                           |
| FOSA          | 754-91-6    | Perfluoro-1-octanesulfonamide                                           |
| MeFOSA        | 31506-32-8  | N-methylperfluoro-1-octanesulfonamide                                   |
| EtFOSA        | 4151-50-2   | N-ethylperfluoro-1-octanesulfonamide                                    |
| 4:2 FTSA      | 757124-72-4 | 1H,1H,2H,2H-perfluorohexane sulfonic acid (4:2)                         |
| 6:2 FTSA      | 27619-97-2  | 1H,1H,2H,2H-perfluorooctane sulfonic acid (6:2)                         |
| 8:2 FTSA      | 39108-34-4  | 1H,1H,2H,2H-perfluorodecane sulfonic acid (8:2)                         |
| M3PFBA (SS)   |             | Perfluoro-n-[2,3,4- <sup>13</sup> C <sub>3</sub> ]butanoic acid         |
| MPFHxA (SS)   |             | Perfluoro-n-[1,2- <sup>13</sup> C <sub>2</sub> ]hexanoic acid           |
| MPFOA (SS)    |             | Perfluoro-n-[1,2,3,4- <sup>13</sup> C <sub>4</sub> ]octanoic acid       |
| MPFUnDA (SS)  |             | Perfluoro-n-[1,2- <sup>13</sup> C <sub>2</sub> ]undecanoic acid         |
| M2PFTeDA (SS) |             | Perfluoro-n-[1,2- <sup>13</sup> C <sub>2</sub> ]tetradecanoic acid      |
| M3PFBS (SS)   |             | Perfluoro-1-[2,3,4- <sup>13</sup> C <sub>3</sub> ]butanesulfonic acid   |
| MPFHxS (SS)   |             | Perfluoro-1-hexane[ <sup>18</sup> O <sub>2</sub> ]sulfonic acid         |
| MPFOS (SS)    |             | Perfluoro-1-[1,2,3,4- <sup>13</sup> C <sub>4</sub> ]octanesulfonic acid |
| dMeFOSA (SS)  |             | N-methyl-d <sub>3</sub> -perfluoro-1-octanesulfonamide                  |

|                   |             |                                                                                                         |
|-------------------|-------------|---------------------------------------------------------------------------------------------------------|
| M2-8:2 FTCA (SS)  |             | 2-Perfluorooctyl-[1,2- <sup>13</sup> C <sub>2</sub> ]-ethanoic acid (8:2)                               |
| M2-8:2 FTSA (SS)  |             | 1H,1H,2H,2H-perfluoro-1-[1,2- <sup>13</sup> C <sub>2</sub> ]-decane sulfonic acid (8:2)                 |
| MPFBA (IS)        |             | Perfluoro-n-[1,2,3,4- <sup>13</sup> C <sub>4</sub> ]butanoic acid                                       |
| M8PFOA (IS)       |             | Perfluoro-n-[ <sup>13</sup> C <sub>8</sub> ]octanoic acid                                               |
| M7PFUnDA (IS)     |             | Perfluoro-n-[1,2,3,4,5,6,7- <sup>13</sup> C <sub>7</sub> ]undecanoic acid                               |
| M3PFHxS (IS)      |             | Perfluoro-1-[1,2,3- <sup>13</sup> C <sub>3</sub> ]hexanesulfonic acid                                   |
| M8PFOS (IS)       |             | Perfluoro-[ <sup>13</sup> C <sub>8</sub> ]octanesulfonic acid                                           |
| 6:2 PAP           | 57678-01-0  | 1H,1H,2H,2H-perfluorooctylphosphate                                                                     |
| 8:2 PAP           | 57678-03-2  | 1H,1H,2H,2H-perfluorodecylphosphate                                                                     |
| 6:2 diPAP         | 57677-95-9  | Bis(1H,1H,2H,2H-perfluorooctyl)phosphate                                                                |
| 6:2/8:2 diPAP     | 943913-15-3 | (1H,1H,2H,2H-perfluorooctyl-1H,1H,2H,2H-perfluorodecyl)phosphate                                        |
| 8:2 diPAP         | 678-41-1    | Bis(1H,1H,2H,2H-perfluorodecyl)phosphate                                                                |
| M2-8:2 PAP (SS)   |             | 1H,1H,2H,2H-[1,2- <sup>13</sup> C <sub>2</sub> ]perfluorodecylphosphate                                 |
| M4-6:2 diPAP (IS) |             | Bis(1H,1H,2H,2H-[1,2- <sup>13</sup> C <sub>2</sub> ]perfluorooctyl)phosphate                            |
| 4:2 FTOH          | 2043-47-2   | 2-Perfluorobutyl ethanol (4:2)                                                                          |
| 6:2 FTOH          | 647-42-7    | 2-Perfluorohexyl ethanol (6:2)                                                                          |
| 8:2 FTOH          | 678-39-7    | 2-Perfluorooctyl ethanol (8:2)                                                                          |
| 10:2 FTOH         | 865-86-1    | 2-Perfluorodecyl ethanol (10:2)                                                                         |
| 6:2 FTAC          | 17527-29-6  | 1H,1H,2H,2H-perfluorooctyl acrylate                                                                     |
| 8:2 FTAC          | 27905-45-9  | 1H,1H,2H,2H-Perfluorodecyl acrylate                                                                     |
| 10:2 FTAC         | 17741-60-5  | 1H,1H,2H,2H-Perfluorododecyl acrylate                                                                   |
| 6:2 FTMAC         | 2144-53-8   | 1H,1H,2H,2H-perfluorooctyl methacrylate                                                                 |
| 8:2 FTMAC         | 1996-88-9   | 1H,1H,2H,2H-heptadecafluorodecyl methacrylate                                                           |
| MeFOSE            | 24448-09-7  | 2-(N-methylperfluoro-1-octanesulfonamido)-ethanol                                                       |
| EtFOSE            | 1691-99-2   | 2-(N-ethylperfluoro-1-octanesulfonamido)-ethanol                                                        |
| M4-4:2 FTOH (SS)  |             | 2-Perfluorobutyl-[1,1,2,2- <sup>2</sup> H <sub>4</sub> ]-ethanol (4:2)                                  |
| M2-8:2 FTOH (SS)  |             | 2-Perfluorooctyl-[1,2- <sup>13</sup> C <sub>2</sub> ]-ethanol (8:2)                                     |
| dMeFOSE (SS)      |             | 2-(N-methyl-d <sub>3</sub> -perfluoro-1-octanesulfonamido)ethanol                                       |
| M4-8:2 FTOH (IS)  |             | 2-Perfluorooctyl-[1,1- <sup>2</sup> H <sub>2</sub> ]-[1,2- <sup>13</sup> C <sub>2</sub> ]-ethanol (8:2) |

**Table S5.** Instrumental parameters of LC-MS/MS for PAPs analysis.

|                   |                                                                                                                                  |     |
|-------------------|----------------------------------------------------------------------------------------------------------------------------------|-----|
| Column            | Acquity BEH C18 1.7 μm (2.1 id x 50 mm)                                                                                          |     |
| Column temp       | 40 °C                                                                                                                            |     |
| Mobile phase      | A = 2 mM ammonium acetate + 5 mM N-Methylpiperidine in water;<br>B = 2 mM ammonium acetate + 5 mM N-Methylpiperidine in methanol |     |
| Flow rate         | 0.4 mL/min                                                                                                                       |     |
| Injection volume  | 5 μL                                                                                                                             |     |
| Mode              | Negative ESI using the Agilent jet spray ionization source                                                                       |     |
| Nebulizer         | 25 psi                                                                                                                           |     |
| Gas flow          | 5 L/min                                                                                                                          |     |
| Gas temp          | 300 °C                                                                                                                           |     |
| Capillary voltage | 2800 V                                                                                                                           |     |
| Sheath gas temp   | 330 °C                                                                                                                           |     |
| Sheath gas flow   | 11 L/min                                                                                                                         |     |
| Ramp gradient     |                                                                                                                                  |     |
| Time (min)        | %A                                                                                                                               | %B  |
| 0.0               | 90                                                                                                                               | 10  |
| 0.5               | 90                                                                                                                               | 10  |
| 1.0               | 70                                                                                                                               | 30  |
| 7.5               | 0                                                                                                                                | 100 |
| 8.0               | 90                                                                                                                               | 10  |
| Post-run (2 min)  | 90                                                                                                                               | 10  |

**Table S6.** Instrumental parameters of LC-MS/MS for ionic PFAS analysis.

|                    |                                              |
|--------------------|----------------------------------------------|
| <b>Column</b>      | Acquity BEH C18 1.7 $\mu$ m (2.1 id x 50 mm) |
| <b>Column temp</b> | 40 °C                                        |

|                          |                                                                              |
|--------------------------|------------------------------------------------------------------------------|
| <b>Mobile phase</b>      | A = 2 mM ammonium acetate in water;<br>B = 2 mM ammonium acetate in methanol |
| <b>Flow rate</b>         | 0.4 mL/min                                                                   |
| <b>Injection volume</b>  | 5 µL                                                                         |
| <b>Mode</b>              | Negative ESI using the Agilent jet spray ionization source                   |
| <b>Nebulizer</b>         | 25 psi                                                                       |
| <b>Gas flow</b>          | 5 L/min                                                                      |
| <b>Gas temp</b>          | 300 °C                                                                       |
| <b>Capillary voltage</b> | 2800 V                                                                       |
| <b>Sheath gas temp</b>   | 330 °C                                                                       |
| <b>Sheath gas flow</b>   | 11 L/min                                                                     |

---



---

**Ramp gradient**

| Time (min)       | %A | %B  |
|------------------|----|-----|
| 0.0              | 90 | 10  |
| 0.5              | 90 | 10  |
| 1.0              | 60 | 40  |
| 17.5             | 0  | 100 |
| 18.0             | 90 | 10  |
| Post-run (3 min) | 90 | 10  |

---

**Table S7.** Instrumental parameters for GC-MS analysis.

|                                   |                                                       |
|-----------------------------------|-------------------------------------------------------|
| <b>Mode</b>                       | Positive chemical ionization                          |
| <b>Inlet temperature</b>          | 200 °C                                                |
| <b>AUX temperature</b>            | 200 °C                                                |
| <b>Injection mode</b>             | Pulsed splitless                                      |
| <b>Injection volume</b>           | 2 µL                                                  |
| <b>Carrier gas (He) flow rate</b> | 1 mL/min                                              |
| <b>Column</b>                     | CP-Wax 57 CB, 25 m, 0.25 mm, 0.20 µm<br>(Agilent J&W) |

  

|                     |                  |
|---------------------|------------------|
| <b>Oven program</b> |                  |
| Time (min)          | Temperature (°C) |
| 0.0                 | 60               |
| 3.0                 | 60               |
| 13.0                | 85               |
| 20.0                | 190              |
| 28.0                | 190              |

**Table S8.** Surrogate standards (SS) and internal standards (IS) used to calculate PFAS concentrations. Surrogates were used as general indicators of overall analytical quality (i.e., recoveries) during the entire analytical process, and internal standards were used for quantitation for both SS and targeted compounds.

| Native PFASs | SS for QA/QC | IS for quantitation | SS for QA/QC | IS for quantitation |
|--------------|--------------|---------------------|--------------|---------------------|
| PFPrA        | M3PFBA       | MPFBA               | M3PFBA       | MPFBA               |
| PFBA         | M3PFBA       | MPFBA               | MPFHxA       | M8PFOA              |
| PFPeA        | M3PFBA       | MPFBA               | MPFOA        | M8PFOA              |
| PFHxA        | MPFHxA       | M8PFOA              | MPFUnDA      | M7PFUnDA            |
| PFHpA        | MPFHxA       | M8PFOA              | M2PFTeDA     | M7PFUnDA            |
| PFOA         | MPFOA        | M8PFOA              | M3PFBS       | M3PFHxS             |
| PFNA         | MPFOA        | M8PFOA              | MPFHxS       | M3PFHxS             |
| PFDA         | MPFUnDA      | M7PFUnDA            | MPFOS        | M8PFOS              |
| PFUnDA       | MPFUnDA      | M7PFUnDA            | M2-8:2 FTSA  | M8PFOS              |
| PFDoDA       | M2PFTeDA     | M7PFUnDA            | dMeFOSA      | M8PFOS              |
| PFTTrDA      | M2PFTeDA     | M7PFUnDA            | M4-4:2 FTOH  | M4-8:2 FTOH         |
| PFTeDA       | M2PFTeDA     | M7PFUnDA            | M2-8:2 FTOH  | M4-8:2 FTOH         |
| PFHxDA       | M2PFTeDA     | M7PFUnDA            | dMeFOSE      | M4-8:2 FTOH         |
| PFPrS        | M3PFBS       | M3PFHxS             | M2-8:2 PAP   | M4-6:2 diPAP        |
| PFBS         | M3PFBS       | M3PFHxS             |              |                     |
| PFPeS        | MPFHxS       | M3PFHxS             |              |                     |
| PFHxS        | MPFHxS       | M3PFHxS             |              |                     |

|               |             |              |
|---------------|-------------|--------------|
| PFHpS         | MPFOS       | M3PFHxS      |
| PFOS          | MPFOS       | M8PFOS       |
| PFNS          | MPFOS       | M8PFOS       |
| PFDS          | MPFOS       | M8PFOS       |
| PFECHS        | MPFOS       | M8PFOS       |
| Cl-PFOS       | MPFOS       | M8PFOS       |
| FBSA          | M3PFBS      | M3PFHxS      |
| FHxSA         | MPFHxS      | M3PFHxS      |
| FOSA          | MPFOS       | M8PFOS       |
| MeFOSA        | dMeFOSA     | M8PFOS       |
| EtFOSA        | dMeFOSA     | M8PFOS       |
| 4:2 FTSA      | M2-8:2 FTSA | M3PFHxS      |
| 6:2 FTSA      | M2-8:2 FTSA | M3PFHxS      |
| 8:2 FTSA      | M2-8:2 FTSA | M8PFOS       |
| 6:2 PAP       | M2-8:2 PAP  | M4-6:2 diPAP |
| 8:2 PAP       | M2-8:2 PAP  | M4-6:2 diPAP |
| 6:2 diPAP     | M2-8:2 PAP  | M4-6:2 diPAP |
| 6:2/8:2 diPAP | M2-8:2 PAP  | M4-6:2 diPAP |
| 8:2 diPAP     | M2-8:2 PAP  | M4-6:2 diPAP |
| 4:2 FTOH      | M4-4:2 FTOH | M4-8:2 FTOH  |
| 6:2 FTOH      | M2-8:2 FTOH | M4-8:2 FTOH  |
| 8:2 FTOH      | M2-8:2 FTOH | M4-8:2 FTOH  |
| 10:2 FTOH     | M2-8:2 FTOH | M4-8:2 FTOH  |
| 6:2 FTAC      | M4-4:2 FTOH | M4-8:2 FTOH  |
| 8:2 FTAC      | M2-8:2 FTOH | M4-8:2 FTOH  |
| 10:2 FTAC     | M2-8:2 FTOH | M4-8:2 FTOH  |
| 6:2 FTMAC     | M2-8:2 FTOH | M4-8:2 FTOH  |
| 8:2 FTMAC     | M2-8:2 FTOH | M4-8:2 FTOH  |
| MeFOSE        | dMeFOSE     | M4-8:2 FTOH  |
| EtFOSE        | dMeFOSE     | M4-8:2 FTOH  |

---

**Table S9.** Ionic PFAS compounds analyzed by LC-MS/MS under ESI (-) mode.

| Abbr.  | Compound Name               | CAS #     | Formula                                         | Retention time (min) | Mol. Wt. | Precursor ion [M-H/D]- | Fragmentor (volts) | Product ions (m/z)       | Collision energy (volts) |
|--------|-----------------------------|-----------|-------------------------------------------------|----------------------|----------|------------------------|--------------------|--------------------------|--------------------------|
| PFPPrA | Perfluoropropanoic acid     | 422-64-0  | C <sub>3</sub> HF <sub>5</sub> O <sub>2</sub>   | 0.738                | 163.99   | 162.9                  | 64                 | <b>119</b><br><b>169</b> | 5<br>5                   |
| PFBA   | Perfluorobutanoic acid      | 375-22-4  | C <sub>4</sub> HF <sub>7</sub> O <sub>2</sub>   | 2.243                | 214.04   | 213.0                  | 64                 | /                        | /                        |
| PFPeA  | Perfluoropentanoic acid     | 2706-90-3 | C <sub>5</sub> HF <sub>9</sub> O <sub>2</sub>   | 3.518                | 264.05   | 263.0                  | 64                 | <b>218.9</b><br>140.8    | 5<br>5                   |
| PFHxA  | Perfluoro-n-hexanoic acid   | 307-24-4  | C <sub>6</sub> HF <sub>11</sub> O <sub>2</sub>  | 5.008                | 314.05   | 313.0                  | 73                 | <b>268.9</b><br>119      | 5<br>21                  |
| PFHpA  | Perfluoro-n-heptanoic acid  | 375-85-9  | C <sub>7</sub> HF <sub>13</sub> O <sub>2</sub>  | 6.646                | 364.06   | 363.0                  | 78                 | <b>319</b><br>169        | 5<br>17                  |
| PFOA   | Perfluoro-n-octanoic acid   | 335-67-1  | C <sub>8</sub> HF <sub>15</sub> O <sub>2</sub>  | 8.186                | 414.07   | 413.1                  | 83                 | <b>369</b><br>169        | 5<br>17                  |
| PFNA   | Perfluoro-n-nonanoic acid   | 375-95-1  | C <sub>9</sub> HF <sub>17</sub> O <sub>2</sub>  | 9.542                | 464.08   | 463.1                  | 83                 | <b>419</b><br>218.9      | 5<br>17                  |
| PFDA   | Perfluoro-n-decanoic acid   | 335-76-2  | C <sub>10</sub> HF <sub>19</sub> O <sub>2</sub> | 10.712               | 514.08   | 513.0                  | 93                 | <b>468.9</b><br>269      | 5<br>17                  |
| PFUnDA | Perfluoro-n-undecanoic acid | 2058-94-8 | C <sub>11</sub> HF <sub>21</sub> O <sub>2</sub> | 11.725               | 564.09   | 563.0                  | 102                | <b>518.9</b><br>268.9    | 5<br>17                  |
| PFDODA | Perfluoro-n-dodecanoic acid | 307-55-1  | C <sub>12</sub> HF <sub>23</sub> O <sub>2</sub> | 12.601               | 614.10   | 613.0                  | 102                | <b>569</b><br>269        | 9<br>21                  |

|         |                                  |            |                                                  |        |        |       |     |                       |           |
|---------|----------------------------------|------------|--------------------------------------------------|--------|--------|-------|-----|-----------------------|-----------|
| PFTTrDA | Perfluoro-n-tridecanoic acid     | 72629-94-8 | C <sub>13</sub> HF <sub>25</sub> O <sub>2</sub>  | 13.347 | 664.11 | 663.1 | 107 | <b>619</b><br>169     | 9<br>29   |
| PFTeDA  | Perfluoro-n-tetradecanoic acid   | 376-06-7   | C <sub>14</sub> HF <sub>27</sub> O <sub>2</sub>  | 13.998 | 714.11 | 713.1 | 112 | <b>668.9</b><br>169   | 13<br>29  |
| PFHxDA  | Perfluoro-n-hexadecanoic acid    | 67905-19-5 | C <sub>16</sub> HF <sub>31</sub> O <sub>2</sub>  | 15.041 | 814.13 | 813.1 | 121 | <b>768.9</b><br>168.9 | 13<br>37  |
| PFPrS   | Perfluoro-1-propanesulfonic acid | 423-41-6   | C <sub>3</sub> HF <sub>7</sub> SO <sub>3</sub>   | 2.748  | 250.09 | 249.1 | 140 | <b>80</b><br>98.9     | 37<br>33  |
| PFBS    | Perfluoro-1-butanesulfonic acid  | 375-73-5   | C <sub>4</sub> HF <sub>9</sub> SO <sub>3</sub>   | 3.876  | 300.10 | 299.0 | 149 | <b>80</b><br>98.9     | 37<br>37  |
| PFPeS   | Perfluoro-1-pentanesulfonic acid | 2706-91-4  | C <sub>5</sub> HF <sub>11</sub> SO <sub>3</sub>  | 5.336  | 350.11 | 349.0 | 175 | <b>80</b><br>98.9     | 45<br>37  |
| PFHxS   | Perfluoro-1-hexanesulfonic acid  | 355-46-4   | C <sub>6</sub> HF <sub>13</sub> SO <sub>3</sub>  | 6.885  | 400.11 | 399.0 | 179 | <b>80</b><br>98.9     | 45<br>41  |
| PFHpS   | Perfluoro-1-heptanesulfonic acid | 375-92-8   | C <sub>7</sub> HF <sub>15</sub> SO <sub>3</sub>  | 8.357  | 450.12 | 449.0 | 183 | <b>80</b><br>98.9     | 49<br>45  |
| PFOS    | Perfluoro-1-octanesulfonic acid  | 1763-23-1  | C <sub>8</sub> HF <sub>17</sub> SO <sub>3</sub>  | 9.647  | 500.13 | 499.0 | 208 | <b>80</b><br>98.9     | 101<br>49 |
| PFNS    | Perfluoro-1-nonanesulfonic acid  | 68259-12-1 | C <sub>9</sub> HF <sub>19</sub> SO <sub>3</sub>  | 10.776 | 549.93 | 549.0 | 218 | <b>80</b><br>98.9     | 105<br>49 |
| PFDS    | Perfluoro-1-decanesulfonic acid  | 335-77-3   | C <sub>10</sub> HF <sub>21</sub> SO <sub>3</sub> | 11.764 | 600.14 | 598.9 | 232 | <b>80</b>             | 137       |

|          |                                                 |             |                                                                  |        |        |       |     |              |     |
|----------|-------------------------------------------------|-------------|------------------------------------------------------------------|--------|--------|-------|-----|--------------|-----|
|          |                                                 |             |                                                                  |        |        |       |     | 98.9         | 53  |
| PFECHS   | Perfluoro-4-ethylcyclohexanesulfonic acid       | 646-83-3    | C <sub>8</sub> HF <sub>15</sub> SO <sub>3</sub>                  | 8.096  | 462.13 | 461.0 | 150 | <b>380.9</b> | 29  |
|          |                                                 |             |                                                                  |        |        |       |     | 98.9         | 29  |
| Cl-PFOS  | 8-Chloroperfluoro-1-octanesulfonic acid         | 777011-38-8 | C <sub>8</sub> HF <sub>16</sub> ClSO <sub>3</sub>                | 9.897  | 516.58 | 515.0 | 203 | <b>80</b>    | 105 |
|          |                                                 |             |                                                                  |        |        |       |     | 98.9         | 49  |
| FBSA     | Perfluoro-1-butanesulfonamide                   | 30334-69-1  | C <sub>4</sub> H <sub>2</sub> F <sub>9</sub> NO <sub>2</sub> S   | 5.272  | 299.12 | 298.0 | 98  | <b>78</b>    | 25  |
|          |                                                 |             |                                                                  |        |        |       |     | 48.1         | 93  |
| FHxSA    | Perfluoro-1-hexanesulfonamide                   | 41997-13-1  | C <sub>6</sub> H <sub>2</sub> F <sub>13</sub> NO <sub>2</sub> S  | 8.778  | 399.13 | 397.9 | 117 | <b>78</b>    | 29  |
|          |                                                 |             |                                                                  |        |        |       |     | 48.1         | 100 |
| FOSA     | Perfluoro-1-octanesulfonamide                   | 754-91-6    | C <sub>8</sub> H <sub>2</sub> F <sub>17</sub> NO <sub>2</sub> S  | 11.159 | 499.14 | 498.0 | 169 | <b>78</b>    | 37  |
|          |                                                 |             |                                                                  |        |        |       |     | 48.1         | 150 |
| MeFOSA   | N-methylperfluoro-1-octanesulfonamide           | 31506-32-8  | C <sub>9</sub> H <sub>4</sub> F <sub>17</sub> NO <sub>2</sub> S  | 12.808 | 513.17 | 512.0 | 160 | <b>169</b>   | 29  |
|          |                                                 |             |                                                                  |        |        |       |     | 218.9        | 25  |
| EtFOSA   | N-ethylperfluoro-1-octanesulfonamide            | 4151-50-2   | C <sub>10</sub> H <sub>6</sub> F <sub>17</sub> NO <sub>2</sub> S | 13.375 | 527.20 | 526.0 | 165 | <b>169</b>   | 29  |
|          |                                                 |             |                                                                  |        |        |       |     | 219          | 29  |
| 4:2 FTSA | 1H,1H,2H,2H-perfluorohexane sulfonic acid (4:2) | 757124-72-4 | C <sub>6</sub> H <sub>5</sub> F <sub>9</sub> O <sub>3</sub> S    | 4.870  | 328.15 | 327.1 | 136 | <b>306.9</b> | 21  |
|          |                                                 |             |                                                                  |        |        |       |     | 81           | 33  |
| 6:2 FTSA | 1H,1H,2H,2H-perfluorooctane sulfonic acid (6:2) | 27619-97-2  | C <sub>8</sub> H <sub>5</sub> F <sub>13</sub> O <sub>3</sub> S   | 8.091  | 428.17 | 427.0 | 164 | <b>406.9</b> | 25  |
|          |                                                 |             |                                                                  |        |        |       |     | 81           | 41  |
| 8:2 FTSA | 1H,1H,2H,2H-perfluorodecane sulfonic acid (8:2) | 39108-34-4  | C <sub>10</sub> H <sub>5</sub> F <sub>17</sub> O <sub>3</sub> S  | 10.676 | 528.18 | 527.0 | 179 | <b>506.9</b> | 29  |
|          |                                                 |             |                                                                  |        |        |       |     | 81           | 41  |

|                                       |                                                                                                |                                                                                                  |        |        |       |     |              |    |
|---------------------------------------|------------------------------------------------------------------------------------------------|--------------------------------------------------------------------------------------------------|--------|--------|-------|-----|--------------|----|
| M3PFBA<br>(surrogate<br>standard, SS) | Perfluoro-n-[2,3,4- <sup>13</sup> C <sub>3</sub> ]butanoic acid                                | CHF <sub>7</sub> O <sub>2</sub> +<br><sup>13</sup> C <sub>3</sub>                                | 2.242  | 217.04 | 216.0 | 64  | <b>172</b>   | 5  |
| MPFHxA<br>(SS)                        | Perfluoro-n-[1,2- <sup>13</sup> C <sub>2</sub> ]hexanoic acid                                  | C <sub>4</sub> HF <sub>11</sub> O <sub>2</sub> +<br><sup>13</sup> C <sub>2</sub>                 | 4.999  | 316.05 | 315.1 | 78  | <b>270</b>   | 5  |
| MPFOA<br>(SS)                         | Perfluoro-n-[1,2,3,4- <sup>13</sup> C <sub>4</sub> ]octanoic acid                              | C <sub>4</sub> HF <sub>15</sub> O <sub>2</sub> +<br><sup>13</sup> C <sub>4</sub>                 | 8.185  | 418.07 | 417.1 | 83  | <b>372</b>   | 5  |
| MPFUnDA<br>(SS)                       | Perfluoro-n-[1,2- <sup>13</sup> C <sub>2</sub> ]undecanoic acid                                | C <sub>9</sub> HF <sub>21</sub> O <sub>2</sub> +<br><sup>13</sup> C <sub>2</sub>                 | 11.725 | 566.09 | 565.1 | 97  | <b>520</b>   | 9  |
| M2PFTeDA<br>(SS)                      | Perfluoro-n-[1,2- <sup>13</sup> C <sub>2</sub> ]tetradecanoic acid                             | C <sub>12</sub> HF <sub>27</sub> O <sub>2</sub> +<br><sup>13</sup> C <sub>2</sub>                | 13.997 | 716.11 | 715.1 | 116 | <b>669.9</b> | 13 |
| M3PFBS<br>(SS)                        | Perfluoro-1-[2,3,4- <sup>13</sup> C <sub>3</sub> ]butanesulfonic acid                          | CHF <sub>9</sub> SO <sub>3</sub> +<br><sup>13</sup> C <sub>3</sub>                               | 3.874  | 303.10 | 302.0 | 149 | <b>80</b>    | 45 |
| MPFHxS<br>(SS)                        | Perfluoro-1-<br>hexane[ <sup>18</sup> O <sub>2</sub> ]sulfonic acid                            | C <sub>6</sub> HF <sub>13</sub> SO +<br><sup>18</sup> O <sub>2</sub>                             | 6.882  | 404.11 | 403.0 | 169 | <b>84</b>    | 49 |
| MPFOS<br>(SS)                         | Perfluoro-1-[1,2,3,4- <sup>13</sup> C <sub>4</sub> ]octanesulfonic acid                        | C <sub>4</sub> HF <sub>17</sub> SO <sub>3</sub> +<br><sup>13</sup> C <sub>4</sub>                | 9.646  | 504.13 | 503.0 | 198 | <b>80</b>    | 93 |
| dMeFOSA<br>(SS)                       | N-methyl-d <sub>3</sub> -perfluoro-1-<br>octanesulfonamide                                     | C <sub>9</sub> HF <sub>17</sub> NO <sub>2</sub> S<br>+ D <sub>3</sub>                            | 12.799 | 516.17 | 515.0 | 160 | <b>169</b>   | 29 |
| M2-8:2<br>FTCA (SS)                   | 2-Perfluorooctyl-[1,2- <sup>13</sup> C <sub>2</sub> ]-ethanoic acid(8:2)                       | C <sub>8</sub> H <sub>3</sub> F <sub>17</sub> O <sub>2</sub> +<br><sup>13</sup> C <sub>2</sub>   | 9.926  | 480.10 | 479.0 | 215 | <b>394</b>   | 11 |
| M2-8:2<br>FTSA (SS)                   | 1H,1H,2H,2H-perfluoro-<br>1-[1,2- <sup>13</sup> C <sub>2</sub> ]-decane<br>sulfonic acid (8:2) | C <sub>8</sub> H <sub>5</sub> F <sub>17</sub> O <sub>3</sub> S +<br><sup>13</sup> C <sub>2</sub> | 10.675 | 530.18 | 529.0 | 195 | <b>509</b>   | 33 |
| MPFBA<br>(internal<br>standard, IS)   | Perfluoro-n-[1,2,3,4- <sup>13</sup> C <sub>4</sub> ]butanoic acid                              | HF <sub>7</sub> O <sub>2</sub> + <sup>13</sup> C <sub>4</sub>                                    | 2.240  | 218.04 | 217.0 | 64  | 172          | 5  |
| M8PFOA<br>(IS)                        | Perfluoro-n-<br>[ <sup>13</sup> C <sub>8</sub> ]octanoic acid                                  | HF <sub>15</sub> O <sub>2</sub> + <sup>13</sup> C <sub>8</sub>                                   | 8.184  | 422.07 | 421.1 | 83  | 376          | 5  |
| M7PFUnD<br>A (IS)                     | Perfluoro-n-<br>[1,2,3,4,5,6,7- <sup>13</sup> C <sub>7</sub> ]undecanoic acid                  | C <sub>4</sub> HF <sub>21</sub> O <sub>2</sub> +<br><sup>13</sup> C <sub>7</sub>                 | 11.724 | 571.09 | 570.0 | 97  | 525          | 9  |
| M3PFHxS<br>(IS)                       | Perfluoro-1-[1,2,3- <sup>13</sup> C <sub>3</sub> ]hexanesulfonic acid                          | C <sub>3</sub> HF <sub>13</sub> SO <sub>3</sub> +<br><sup>13</sup> C <sub>3</sub>                | 6.883  | 403.11 | 402.0 | 184 | 80           | 45 |
| M8PFOS<br>(IS)                        | Perfluoro-<br>[ <sup>13</sup> C <sub>8</sub> ]octanesulfonic acid                              | HF <sub>17</sub> SO <sub>3</sub> +<br><sup>13</sup> C <sub>8</sub>                               | 9.637  | 508.13 | 507.0 | 203 | 79.9         | 97 |

**Table S10.** PAPs compounds analyzed by LC-MS/MS under ESI (-) mode.

| Abbr.                        | Compound Name                                                                | CAS #       | Formula                                                                                        | Retention time (min) | Mol. Wt. | Precursor ion [M-H/D]- | Fragmentor (volts) | Product ions (m/z) | Collision energy (volts) |
|------------------------------|------------------------------------------------------------------------------|-------------|------------------------------------------------------------------------------------------------|----------------------|----------|------------------------|--------------------|--------------------|--------------------------|
| 6:2 PAP                      | 1H,1H,2H,2H-perfluorooctylphosphate                                          | 57678-01-0  | C <sub>8</sub> H <sub>6</sub> F <sub>13</sub> O <sub>4</sub> P                                 | 3.513                | 443.98   | 443                    | 108                | <b>97</b>          | 17                       |
|                              |                                                                              |             |                                                                                                |                      |          |                        |                    | 79                 | 100                      |
| 8:2 PAP                      | 1H,1H,2H,2H-perfluorodecylphosphate                                          | 57678-03-2  | C <sub>10</sub> H <sub>6</sub> F <sub>17</sub> O <sub>4</sub> P                                | 4.306                | 543.97   | 543                    | 108                | <b>97</b>          | 21                       |
|                              |                                                                              |             |                                                                                                |                      |          |                        |                    | 79                 | 93                       |
| 6:2 diPAP                    | Bis(1H,1H,2H,2H-perfluorooctyl)phosphate                                     | 57677-95-9  | C <sub>16</sub> H <sub>9</sub> F <sub>26</sub> O <sub>4</sub> P                                | 5.289                | 789.98   | 789                    | 132                | <b>442.9</b>       | 17                       |
|                              |                                                                              |             |                                                                                                |                      |          |                        |                    | 97                 | 37                       |
| 6:2/8:2 diPAP                | (1H,1H,2H,2H-perfluorooctyl-1H,1H,2H,2H-perfluorodecyl)phosphate             | 943913-15-3 | C <sub>18</sub> H <sub>9</sub> F <sub>30</sub> O <sub>4</sub> P                                | 5.478                | 889.98   | 889                    | 156                | <b>443</b>         | 21                       |
|                              |                                                                              |             |                                                                                                |                      |          |                        |                    | 96.9               | 33                       |
| 8:2 diPAP                    | Bis(1H,1H,2H,2H-perfluorodecyl)phosphate                                     | 678-41-1    | C <sub>20</sub> H <sub>9</sub> F <sub>34</sub> O <sub>4</sub> P                                | 5.622                | 989.97   | 989                    | 151                | <b>542.9</b>       | 25                       |
| M2-8:2 PAP (SS)              | 1H,1H,2H,2H-[1,2- <sup>13</sup> C <sub>2</sub> ]perfluorodecylphosphate      |             | C <sub>8</sub> H <sub>6</sub> F <sub>17</sub> O <sub>4</sub> P[ <sup>13</sup> C] <sub>2</sub>  | 4.305                | 545.98   | 545                    | 113                | <b>97</b>          | 17                       |
| M4-6:2 diPAP (IS)<br>6:2 PAP | Bis(1H,1H,2H,2H-[1,2- <sup>13</sup> C <sub>2</sub> ]perfluorooctyl)phosphate |             | C <sub>12</sub> H <sub>9</sub> F <sub>26</sub> O <sub>4</sub> P[ <sup>13</sup> C] <sub>4</sub> | 5.288                | 794.00   | 793                    | 137                | 445                | 21                       |

**Table S11.** PFASs analyzed by GC-MS under positive chemical ionization (PCI) mode.

| Abbr.            | Compound Name                                                                                          | CAS #      | Formula                                                                                       | Mol. Wt. | Retention time (min) | Quantifier | Qualifier |
|------------------|--------------------------------------------------------------------------------------------------------|------------|-----------------------------------------------------------------------------------------------|----------|----------------------|------------|-----------|
| 4:2 FTOH         | 2-Perfluorobutyl ethanol (4:2)                                                                         | 2043-47-2  | C <sub>6</sub> H <sub>5</sub> F <sub>9</sub> O                                                | 264.09   | 5.840                | 265        | 227       |
| 6:2 FTOH         | 2-Perfluorohexyl ethanol (6:2)                                                                         | 647-42-7   | C <sub>8</sub> H <sub>5</sub> F <sub>13</sub> O                                               | 364.10   | 7.569                | 365        | 327       |
| 8:2 FTOH         | 2-Perfluorooctyl ethanol (8:2)                                                                         | 678-39-7   | C <sub>10</sub> H <sub>5</sub> F <sub>17</sub> O                                              | 464.12   | 9.993                | 465        | 427       |
| 10:2 FTOH        | 2-Perfluorodecyl ethanol (10:2)                                                                        | 865-86-1   | C <sub>12</sub> H <sub>5</sub> F <sub>21</sub> O                                              | 564.13   | 12.460               | 565        | 527       |
| 6:2 FTAc         | 1H,1H,2H,2H-perfluorooctyl acrylate                                                                    | 17527-29-6 | C <sub>11</sub> H <sub>7</sub> F <sub>13</sub> O <sub>2</sub>                                 | 418.15   | 6.450                | 419        | 399       |
| 8:2 FTAc         | 1H,1H,2H,2H-Perfluorodecyl acrylate                                                                    | 27905-45-9 | C <sub>13</sub> H <sub>7</sub> F <sub>17</sub> O <sub>2</sub>                                 | 518.17   | 9.100                | 519        | 499       |
| 10:2FTAc         | 1H,1H,2H,2H-Perfluorododecyl acrylate                                                                  | 17741-60-5 | C <sub>15</sub> H <sub>7</sub> F <sub>21</sub> O <sub>2</sub>                                 | 618.18   | 11.916               | 619        | 599       |
| 6:2 FTMAc        | 1H,1H,2H,2H-perfluorooctyl methacrylate                                                                | 2144-53-8  | C <sub>12</sub> H <sub>9</sub> F <sub>13</sub> O <sub>2</sub>                                 | 432.18   | 7.672                | 433        | 413       |
| 8:2 FTMAc        | 1H,1H,2H,2H-heptadecafluorodecyl methacrylate                                                          | 1996-88-9  | C <sub>14</sub> H <sub>9</sub> F <sub>17</sub> O <sub>2</sub>                                 | 532.19   | 10.413               | 533        | 513       |
| MeFOSE           | 2-(N-methylperfluoro-1-octanesulfonamido)-ethanol                                                      | 24448-09-7 | C <sub>11</sub> H <sub>8</sub> F <sub>17</sub> NO <sub>3</sub> S                              | 557.22   | 19.068               | 558        | 540       |
| EtFOSE           | 2-(N-ethylperfluoro-1-octanesulfonamido)-ethanol                                                       | 1691-99-2  | C <sub>12</sub> H <sub>10</sub> F <sub>17</sub> NO <sub>3</sub>                               | 571.25   | 19.194               | 572        | 554       |
| M4-4:2 FTOH (SS) | 2-Perfluorobutyl-[1,1,2,2- <sup>2</sup> H <sub>4</sub> ]-ethanol(4:2)                                  |            | C <sub>6</sub> HF <sub>9</sub> O + D <sub>4</sub>                                             | 268.09   | 5.776                | 269        | 230       |
| M2-8:2 FTOH (SS) | 2-Perfluorooctyl-[1,2- <sup>13</sup> C <sub>2</sub> ]-ethanol(8:2)                                     |            | C <sub>8</sub> H <sub>5</sub> F <sub>17</sub> O + <sup>13</sup> C <sub>2</sub>                | 466.12   | 9.985                | 467        | 429       |
| dMeFOSE (SS)     | 2-(N-methyl-d <sub>3</sub> -perfluoro-1-octanesulfonamido)ethan-d <sub>4</sub> -ol                     |            | C <sub>11</sub> H <sub>1</sub> F <sub>17</sub> NO <sub>3</sub> S + D <sub>7</sub>             | 564.22   | 19.028               | 565        | 547       |
| M4-8:2 FTOH (IS) | 2-Perfluorooctyl-[1,1- <sup>2</sup> H <sub>2</sub> ]-[1,2- <sup>13</sup> C <sub>2</sub> ]-ethanol(8:2) |            | C <sub>8</sub> H <sub>3</sub> F <sub>17</sub> O + <sup>13</sup> C <sub>2</sub> D <sub>2</sub> | 468.12   | 9.946                | 469        | 431       |

**Table S12.** Field, and procedural blanks for target analysis and for TOP and hydrolysis assay (ng, average  $\pm$  standard error), matrix spike recoveries (MS%, mean  $\pm$  standard error) and method detection limits (MDLs, after blank correction, ng/g) of individual PFAS analytes from the MS analyses. ORG, FBK, PBK, TOP and HYD represent original extraction, field blank, procedural blank, the TOP assay blank, and hydrolysis blank samples, respectively.

|          | Blanks (ng)     |                 |                 |             | MS recovery(%)  |                 | MDL (ng/g) |      |      |     |
|----------|-----------------|-----------------|-----------------|-------------|-----------------|-----------------|------------|------|------|-----|
|          | FBK (n=5)       | PBK (n = 11)    | TOP (n = 2)     | HYD (n = 2) | ORG (n=9)       | TOP (n=3)       | FBK        | PBK  | TOP  | HYD |
| PFPPrA   | 0.15 $\pm$ 0.02 | 0.23 $\pm$ 0.02 | 1.01 $\pm$ 0.34 |             | 104 $\pm$ 14.3  | 67.4 $\pm$ 1.17 | 1.16       | 1.78 | 14.4 |     |
| PFBA     | 0.32 $\pm$ 0.03 | 0.33 $\pm$ 0.04 | 0.77 $\pm$ 0.32 |             | 93.8 $\pm$ 3.09 | 86.4 $\pm$ 0.39 | 2.09       | 3.49 | 13.7 |     |
| PFPeA    |                 |                 |                 |             | 98.7 $\pm$ 7.11 | 144 $\pm$ 4.29  | 0.09       | 0.09 | 0.09 |     |
| PFHxA    |                 |                 |                 |             | 69.4 $\pm$ 3.53 | 80.6 $\pm$ 0.92 | 0.11       | 0.14 | 0.07 |     |
| PFHpA    |                 |                 |                 |             | 72.3 $\pm$ 5.23 | 75.0 $\pm$ 1.18 | 0.05       | 0.05 | 0.05 |     |
| PFOA     | 0.01 $\pm$ 0.00 | 0.01 $\pm$ 0.00 |                 |             | 88.9 $\pm$ 4.01 | 77.1 $\pm$ 3.11 | 0.11       | 0.24 | 0.04 |     |
| PFNA     |                 |                 |                 |             | 81.5 $\pm$ 5.20 | 68.1 $\pm$ 1.80 | 0.07       | 0.06 | 0.07 |     |
| PFDA     |                 |                 | 0.10 $\pm$ 0.03 |             | 102 $\pm$ 3.25  |                 | 0.05       | 0.11 | 1.16 |     |
| PFUnDA   |                 |                 |                 |             | 94.7 $\pm$ 3.96 |                 | 0.16       | 0.04 | 0.06 |     |
| PFDoDA   |                 |                 | 0.15 $\pm$ 0.01 |             | 91.2 $\pm$ 6.12 |                 | 0.08       | 0.08 | 0.31 |     |
| PFTTrDA  |                 |                 |                 |             | 108 $\pm$ 8.83  |                 | 0.05       | 0.05 | 0.06 |     |
| PFTeDA   |                 |                 |                 |             | 94.0 $\pm$ 4.04 |                 | 0.07       | 0.07 | 0.07 |     |
| PFHxDA   | 0.02 $\pm$ 0.00 | 0.02 $\pm$ 0.00 |                 |             | 111 $\pm$ 9.23  |                 | 0.24       | 0.21 | 0.10 |     |
| PFPPrS   |                 |                 |                 |             | 80.1 $\pm$ 2.81 | 117 $\pm$ 1.53  | 0.07       | 0.07 | 0.07 |     |
| PFBS     |                 |                 |                 |             | 80.5 $\pm$ 2.41 | 123 $\pm$ 1.94  | 0.02       | 0.02 | 0.01 |     |
| PFPeS    |                 |                 |                 |             | 82.2 $\pm$ 1.91 | 116 $\pm$ 3.48  | 0.01       | 0.01 | 0.01 |     |
| PFHxS    |                 |                 |                 |             | 88.5 $\pm$ 1.47 | 99.4 $\pm$ 2.81 | 0.01       | 0.11 | 0.02 |     |
| PFHpS    |                 |                 |                 |             | 94.8 $\pm$ 1.93 | 92.7 $\pm$ 2.67 | 0.05       | 0.05 | 0.05 |     |
| PFOS     |                 |                 |                 |             | 92.5 $\pm$ 3.21 | 94.8 $\pm$ 3.57 | 0.02       | 0.05 | 0.05 |     |
| PFNS     |                 |                 |                 |             | 93.8 $\pm$ 2.22 | 81.8 $\pm$ 4.30 | 0.02       | 0.02 | 0.02 |     |
| PFDS     |                 |                 |                 |             | 90.5 $\pm$ 3.18 |                 | 0.08       | 0.08 | 0.08 |     |
| PFECHS   |                 |                 |                 |             | 85.9 $\pm$ 2.61 |                 | 0.03       | 0.03 | 0.03 |     |
| Cl-PFOS  |                 |                 |                 |             | 91.6 $\pm$ 2.47 |                 | 0.05       | 0.05 | 0.05 |     |
| 4:2 FTSA |                 |                 |                 |             | 87.4 $\pm$ 3.26 |                 | 0.03       | 0.03 | 0.03 |     |
| 6:2 FTSA | 0.01 $\pm$ 0.01 | 0.02 $\pm$ 0.01 | 0.98 $\pm$ 0.16 |             | 156 $\pm$ 12.3  |                 | 0.32       | 0.95 | 6.84 |     |
| 8:2 FTSA |                 |                 |                 |             | 119 $\pm$ 4.73  |                 | 0.02       | 0.03 | 0.03 |     |
| FBSA     |                 |                 |                 |             | 74.8 $\pm$ 1.40 |                 | 0.02       | 0.02 | 0.05 |     |
| FHxSA    |                 |                 |                 |             | 91.2 $\pm$ 2.83 |                 | 0.02       | 0.02 | 0.02 |     |

|               |           |           |           |           |           |  |      |      |      |      |
|---------------|-----------|-----------|-----------|-----------|-----------|--|------|------|------|------|
| FOSA          |           |           |           |           | 108±3.20  |  | 0.08 | 0.03 | 0.03 |      |
| MeFOSA        |           |           |           |           | 89.4±3.08 |  | 0.03 | 0.03 | 0.03 |      |
| EtFOSA        |           |           |           |           | 96.7±3.40 |  | 0.01 | 0.04 | 0.04 |      |
| 4:2 FTOH      |           |           |           |           | 63.5±3.46 |  | 3.70 | 3.70 | 3.70 | 3.70 |
| 6:2 FTOH      | 0.59±0.15 | 0.26±0.12 |           |           | 67.7±5.02 |  | 9.19 | 7.03 | 2.20 | 2.20 |
| 8:2 FTOH      | 1.21±0.09 | 1.11±0.08 | 0.65±0.11 | 0.23±0.23 | 86.4±1.95 |  | 5.72 | 7.99 | 4.79 | 7.45 |
| 10:2 FTOH     | 0.02±0.03 |           |           | 0.08±0.23 | 91.2±7.91 |  | 1.99 | 2.18 | 2.20 | 2.65 |
| MeFOSE        |           | 0.03±0.02 |           | 0.03±0.03 | 72.6±6.53 |  | 2.26 | 2.23 | 2.30 | 1.78 |
| EtFOSE        |           |           |           | 0.02±0.02 | 70.6±7.31 |  | 2.18 | 2.20 | 2.20 | 1.81 |
| 6:2 FTAc      |           |           |           | 0.05±0.05 | 63.7±4.02 |  | 0.24 | 0.32 | 0.32 | 1.48 |
| 8:2 FTAc      |           |           |           | 0.03±0.03 | 86.4±12.8 |  | 0.39 | 0.39 | 0.39 | 0.90 |
| 10:2 FTAc     | 0.01±0.00 |           |           | 0.02±0.02 | 101±11.0  |  | 0.33 | 0.36 | 0.41 | 0.78 |
| 6:2 FTMAc     |           |           |           | 0.06±0.06 | 70.6±4.34 |  | 0.31 | 0.03 | 0.31 | 1.82 |
| 8:2 FTMAc     |           | 0.03±0.03 |           | 0.01±0.01 | 83.4±5.00 |  | 0.34 | 0.03 | 0.34 | 0.34 |
| 6:2 PAP       |           | 0.02±0.01 | 0.15±0.01 |           | 58.3±10.3 |  | 0.39 | 0.27 | 0.35 |      |
| 8:2 PAP       | 0.02±0.04 | 0.04±0.02 | 0.11±0.07 |           | 97.0±3.84 |  | 1.04 | 2.12 | 2.92 |      |
| 6:2 diPAP     |           |           | 0.01±0.00 |           | 91.8±2.75 |  | 0.14 | 0.08 | 0.02 |      |
| 6:2/8:2 diPAP | 0.01±0.01 |           | 0.01±0.00 |           | 144±8.70  |  | 0.33 | 0.05 | 0.16 |      |
| 8:2 diPAP     |           |           | 0.01±0.00 |           | 99.2±7.76 |  | 0.16 | 0.05 | 0.11 |      |

**Table S13.** Surrogate recoveries (% , average  $\pm$  standard error) for original extraction (ORI) and TOP assay (TOP) procedure.

|             | ORI            | TOP             |
|-------------|----------------|-----------------|
| M3PFBA      | 92.5 $\pm$ 1.7 | 51.4 $\pm$ 6.6  |
| M3PFBS      | 85.9 $\pm$ 0.7 | 82.1 $\pm$ 12.1 |
| MPFHxA      | 74.5 $\pm$ 1.5 | 83.5 $\pm$ 2.8  |
| MPFHxS      | 92.5 $\pm$ 0.8 | 92.3 $\pm$ 2.6  |
| MPFOA       | 95.8 $\pm$ 1.2 | 62.1 $\pm$ 5.6  |
| MPFOS       | 90.5 $\pm$ 0.9 | 94.8 $\pm$ 9.1  |
| MPFUdA      | 97.8 $\pm$ 1.7 |                 |
| M2PFTeDA    | 104 $\pm$ 2.5  |                 |
| M2-8:2 FTSA | 137 $\pm$ 7.2  | 89.8 $\pm$ 9.7  |
| dMeFOSA     | 98.7 $\pm$ 3.2 |                 |
| M4-4:2 FTOH | 57.8 $\pm$ 1.3 |                 |
| M2-8:2 FTOH | 75.1 $\pm$ 1.4 | 52.0 $\pm$ 10.1 |
| dMeFOSE     | 76.1 $\pm$ 2.5 | 115 $\pm$ 15.6  |
| M2-8-2_PAP  | 112 $\pm$ 10.5 | 41.8 $\pm$ 7.1  |

**Table S14.** Relative Standard Deviation (RSD, %) of individual PFAS in field and lab duplicates

|                     | <b>Field Duplicates</b> |                    | <b>Lab duplicates</b> |                  |                 |
|---------------------|-------------------------|--------------------|-----------------------|------------------|-----------------|
|                     | UOT-IP-5a/2-IP-19a      | UOT-IP-16c/2-IP-7c | UOT-IP-19a/20a        | UOT-2-IP-20a/21a | UOT-IP-US-34/35 |
| <b><i>PFCAs</i></b> |                         |                    |                       |                  |                 |
| PFPrA               | 6.95                    | 12.2               | 16.1                  | 4.1              |                 |
| PFBA                | 5.50                    | 26.3               |                       | 4.0              |                 |
| PFPeA               |                         |                    |                       | 16.8             | 12.8            |
| PFHxA               | 10.4                    | 17.9               | 19.4                  |                  |                 |
| PFHpA               | 21.8                    |                    | 43.3                  | 41.2             |                 |
| PFOA                |                         | 38.4               |                       |                  |                 |
| <b><i>PFSA</i>s</b> |                         |                    |                       |                  |                 |
| PFHxS               |                         |                    |                       |                  |                 |
| PFOS                | 25.9                    |                    |                       |                  |                 |
| Cl-PFOS             |                         |                    |                       |                  |                 |
| <b><i>PAP</i>s</b>  |                         |                    |                       |                  |                 |
| 6-2_diPAP           |                         |                    |                       |                  |                 |
| <b>Neutral PFAS</b> |                         |                    |                       |                  |                 |
| 6:2 FTOH            | 7.90                    | 17.9               | 11.6                  | 5.7              |                 |
| 8:2 FTOH            | 3.63                    |                    |                       | 15.0             |                 |
| 10:2 FTOH           |                         |                    |                       | 13.9             |                 |
| 6:2 FTAcr           |                         |                    |                       |                  |                 |
| 8:2 FTAcr           |                         |                    |                       | 21.8             |                 |
| 6:2 FTMAcr          | 19.8                    | 1.3                | 12.7                  | 19.1             |                 |
| ΣPFAS               | 12.2                    | 11.4               | 12.2                  | 10.9             | 12.8            |

**Table S15:** School uniforms marketed as “stain resistant” as reported by major school uniform retailer websites.

| <b>Retailer number</b> | <b>Website country (CAN or US)</b> | <b>Number of uniforms marketed as “stain resistant”</b> | <b>Total number of uniform items</b> | <b>Percent of uniforms marketed as “stain resistant”</b> | <b>Date of data collection</b> |
|------------------------|------------------------------------|---------------------------------------------------------|--------------------------------------|----------------------------------------------------------|--------------------------------|
| 1                      | US                                 | 65                                                      | 338                                  | 19.23                                                    | Aug-2021                       |
| 2                      | CAN                                | 1                                                       | 59                                   | 1.69                                                     | Aug-2021                       |
| 3                      | CAN                                | 52                                                      | 365                                  | 14.25                                                    | Aug-2021                       |
| 4                      | US                                 | 2                                                       | 95                                   | 2.11                                                     | Oct-2021                       |
| 5                      | US                                 | 5                                                       | 62                                   | 8.06                                                     | Oct-2021                       |

**Table S16.** Detection Frequencies (df, %), min, max, median and mean concentration (ng/g) of PFAS in five selected school uniforms analyzed before and after oxidization by the total oxidizable precursor (TOP) assay and before and after hydrolysis.

|                       |        | Total<br>targete<br>d |       |        |        |       |       |      |       |       |       |         | 6:2   | 6:2  | 6:2   |
|-----------------------|--------|-----------------------|-------|--------|--------|-------|-------|------|-------|-------|-------|---------|-------|------|-------|
| ng/g                  |        | PFAS                  | PFPrA | PFBA   | PFPeA  | PFHxA | PFHpA | PFNA | PFBS  | PFPeS | PFHxS | 6:2 FTS | FTOH  | FTAc | FTMAc |
| <b>Before<br/>TOP</b> | df     | 100                   |       | 20.0   |        | 100   | 80.0  |      | 20.0  |       |       | 20.0    | 80.0  | 60.0 | 60.0  |
|                       | min    | 40.6                  |       | ND     |        | 0.539 | ND    |      | ND    |       |       | ND      | ND    | ND   | ND    |
|                       | max    | 72000                 |       | 22.6   |        | 4.20  | 0.32  |      | 6.47  |       |       | 1.03    | 72000 | 36.6 | 371   |
|                       | median | 16200                 |       | 3.19   |        | 1.59  | 0.15  |      | 0.01  |       |       | 0.50    | 16200 | 2.58 | 4.15  |
|                       | mean   | 21600                 |       | 6.99   |        | 1.85  | 0.17  |      | 1.30  |       |       | 0.61    | 21500 | 13.5 | 108   |
| <b>After<br/>TOP</b>  | df     | 100                   | 100   | 100    | 100    | 100   | 100   | 100  | 100   | 60.0  | 60.0  | 60.0    | 100   |      |       |
|                       | min    | 3520                  | 176   | 579    | 878    | 7.99  | 0.743 | 2.35 | 0.357 | ND    | ND    | ND      | 143   |      |       |
|                       | max    | 308000                | 35300 | 154000 | 167000 | 40900 | 2120  | 5.24 | 19400 | 6.97  | 11.9  | 80.4    | 550   |      |       |
|                       | median | 105000                | 6900  | 21200  | 16800  | 6140  | 446   | 4.32 | 2.45  | 0.947 | 0.566 | 52.7    | 225   |      |       |
|                       | mean   | 126000                | 12200 | 48600  | 49300  | 10900 | 853   | 4.02 | 3890  | 1.79  | 3.77  | 40.4    | 282   |      |       |

| ng/g                         |        | 4:2<br>FTOH | 6:2<br>FTOH | 8:2<br>FTOH | 10:2<br>FTOH | 6:2<br>FTAC | 8:2<br>FTAC | 10:2<br>FTAC | 6:2<br>FTMAC | 8:2<br>FTMAC | MeFOSE | EtFOSE |
|------------------------------|--------|-------------|-------------|-------------|--------------|-------------|-------------|--------------|--------------|--------------|--------|--------|
| <b>Before<br/>hydrolysis</b> | df     | 20.0        | 80.0        | 20.0        | 20.0         | 60.0        | 20.0        | 20.0         | 60.0         |              | 20.0   |        |
|                              | min    | ND          | ND          | ND          | ND           | ND          | ND          | ND           | ND           |              | ND     |        |
|                              | Max    | 5.25        | 72000       | 29.0        | 16.1         | 36.6        | 7.70        | 8.50         | 371          |              | 5.78   |        |
|                              | Median | 1.81        | 16200       | 9.49        | 1.08         | 2.58        | 0.19        | 0.38         | 4.15         |              | 1.12   |        |
|                              | Mean   | 2.46        | 21500       | 13.2        | 4.05         | 13.5        | 1.69        | 2.00         | 108          |              | 2.03   |        |
| <b>After<br/>Hydrolysis</b>  | Df     | 40.0        | 80.0        | 20.0        | 80.0         | 20.0        | 40.0        | 80.0         | 20.0         | 40.0         | 100.0  | 60.0   |
|                              | Min    | ND          | ND          | ND          | ND           | ND          | ND          | ND           | ND           | ND           | 22.0   | ND     |
|                              | Max    | 777         | 3160000     | 132         | 53.7         | 7.87        | 50.7        | 24.2         | 35.7         | 21.5         | 641    | 29.8   |
|                              | Median | 6.17        | 1220000     | 19.6        | 28.0         | 3.89        | 2.41        | 10.6         | 4.80         | 0.93         | 62.2   | 10.8   |
|                              | Mean   | 183         | 1450000     | 42.2        | 28.7         | 4.68        | 18.2        | 12.5         | 11.0         | 7.83         | 178    | 12.1   |

**Table S17** Concentration (ng/g) of individual PFAS in five selected school uniforms analyzed before and after oxidization by the total oxidizable precursor (TOP) assay and before and after hydrolysis. Original, TOP and HYD represent original extraction, TOP assay, and hydrolysis.

| Concentration,<br>ng/g | US-16    |        |     | US-24    |       |     | Original<br>1 | US-25  |     | Original<br>1 | US-27 |       | US-29    |       |       |
|------------------------|----------|--------|-----|----------|-------|-----|---------------|--------|-----|---------------|-------|-------|----------|-------|-------|
|                        | Original | TOP    | HYD | Original | TOP   | HYD |               | TOP    | HYD |               | TOP   | HYD   | Original | TOP   | HYD   |
| <b><i>PFCA</i>s</b>    |          |        |     |          |       |     |               |        |     |               |       |       |          |       |       |
| PFPrA                  |          | 6900   |     |          | 176   |     |               | 35300  |     |               |       | 15600 |          |       | 2970  |
| PFBA                   | 22.6     | 154000 |     |          | 579   |     |               | 62400  |     |               |       | 21200 |          |       | 4740  |
| PFPeA                  |          | 878    |     |          | 1630  |     |               | 167000 |     |               |       | 60900 |          |       | 16800 |
| PFHxA                  | 4.21     | 7.99   |     | 1.32     | 885   |     | 1.62          | 40900  |     | 0.542         |       | 6520  |          | 1.59  | 6140  |
| PFHpA                  | 0.151    | 0.743  |     | 0.070    | 42.5  |     | 0.258         | 2120   |     |               |       | 446   |          | 0.324 | 1650  |
| PFOA                   | 0.330    |        |     |          |       |     |               |        |     |               |       |       |          | 0.287 | 4.97  |
| PFNA                   |          | 2.35   |     |          | 5.11  |     |               | 4.32   |     |               |       | 3.08  |          |       | 5.24  |
| PFDA                   | 0.381    |        |     | 0.160    |       |     |               |        |     |               |       |       |          |       |       |
| PFUdA                  | 0.084    |        |     |          |       |     | 0.0591        |        |     |               |       |       |          |       |       |
| PFDoA                  | 0.127    |        |     |          |       |     |               |        |     |               |       |       |          | 0.106 |       |
| PFTTrDA                | 0.186    |        |     |          |       |     |               |        |     |               |       |       |          | 0.274 |       |
| PFTeDA                 |          | 1.69   |     |          | 1.51  |     |               | 1.63   |     |               |       | 1.25  |          |       | 1.61  |
| <b><i>PFSA</i>s</b>    |          |        |     |          |       |     |               |        |     |               |       |       |          |       |       |
| PFPrS                  |          | 1.67   |     |          |       |     |               |        |     |               |       |       |          |       |       |
| PFBS                   | 6.47     | 19400  |     |          | 0.774 |     |               | 2.88   |     |               |       | 2.45  |          |       | 0.357 |
| PFPeS                  |          |        |     |          |       |     |               | 6.97   |     |               |       | 1.01  |          |       | 0.947 |
| PFHxS                  |          |        |     |          | 0.566 |     |               | 11.9   |     |               |       |       |          |       | 6.34  |
| PFHpS                  |          |        |     |          |       |     |               | 0.318  |     |               |       |       |          |       |       |
| PFDS                   |          |        |     | 0.386    |       |     |               |        |     |               |       |       |          |       |       |
| <b><i>FTS</i>s</b>     |          |        |     |          |       |     |               |        |     |               |       |       |          |       |       |
| 4:2 FTS                | 0.028    |        |     |          |       |     |               |        |     |               |       | 0.431 |          |       |       |
| 6:2 FTS                |          | 68.8   |     | 1.06     | 52.7  |     |               | 80.4   |     |               |       |       |          |       |       |
| 8:2 FTS                |          |        |     |          |       |     |               |        |     | 0.038         |       |       |          |       |       |
| <b><i>PAP</i>s</b>     |          |        |     |          |       |     |               |        |     |               |       |       |          |       |       |

|                     |       |      |      |     |       |         |       |       |         |       |      |        |       |     |        |
|---------------------|-------|------|------|-----|-------|---------|-------|-------|---------|-------|------|--------|-------|-----|--------|
| 6-2_PAP             |       | 5.72 |      |     |       |         | 0.478 | 17.0  |         |       |      |        |       |     |        |
| 6-2_diPAP           |       |      |      |     | 0.278 |         |       | 0.178 |         |       |      |        | 1.12  |     |        |
| <b>Neutral PFAS</b> |       |      |      |     |       |         |       |       |         |       |      |        |       |     |        |
| FBSA                | 0.284 | 91.7 |      |     |       |         |       |       |         |       |      |        |       |     |        |
| 4:2 FTOH            |       |      |      |     | 122   |         |       | 777   |         |       |      |        | 5.25  |     |        |
| 6:2 FTOH            |       | 225  |      | 445 | 143   | 1270000 | 72000 | 550   | 1580000 | 16200 | 220  | 609000 | 18800 | 272 | 172000 |
| 8:2 FTOH            |       |      | 62.6 |     |       |         |       |       |         |       |      |        | 29.03 |     |        |
| 10:2 FTOH           |       |      | 25.6 |     |       | 26.8    |       |       |         |       | 25.9 | 28.0   | 16.1  |     | 28.0   |
| 6:2 FTAc            |       |      | 7.87 |     |       |         | 28.2  |       |         | 36.6  |      |        | 2.58  |     |        |
| 8:2 FTAc            |       |      |      |     |       | 50.7    |       |       | 33.4    |       |      |        | 7.70  |     |        |
| 10:2 FTAc           |       |      | 10.6 |     |       |         |       |       | 24.2    |       |      | 15.1   | 8.50  |     | 10.4   |
| 6:2 FTMAc           |       |      |      | 371 |       |         | 4.15  |       |         | 1.47  |      |        | 161   |     | 35.7   |
| 8:2 FTMAc           |       |      |      |     |       | 21.5    |       |       | 14.9    |       |      |        |       |     |        |
| MeFOSE              | 5.78  |      | 641  |     |       | 22.0    |       |       | 59.6    |       |      | 105    |       |     | 62.2   |
| EtFOSE              |       |      | 12.9 |     |       |         |       |       |         |       |      | 29.8   |       |     | 10.8   |

**Table S18.** Comparison of PFAS concentrations in earlier studies and this study

| <b>Year of PFAS analysis, sampling location</b> | <b>Year of products purchased</b> | <b>Type of products</b>                                 | <b>Ionic PFAS, µg/m<sup>2</sup></b>                         | <b>FTOHs and FT(M)ACs, µg/m<sup>2</sup></b>                                                   | <b>Total targeted PFAS, µg/m<sup>2</sup></b>  | <b>Ref.</b> |
|-------------------------------------------------|-----------------------------------|---------------------------------------------------------|-------------------------------------------------------------|-----------------------------------------------------------------------------------------------|-----------------------------------------------|-------------|
| 2006, Scandinavia                               | 2006*                             | Outdoor clothing (16)                                   | 2.33 to 453<br>(median:18.0)                                | Total FTOHs: ND-10700<br>(median: 94.4) predominate: 8:2 FTOH, followed by 10:2 FTOH          |                                               | 16          |
| 2009, US                                        | 2007-2008                         | Children's uniform (4)                                  | PFCAs: 90.3-672.ng/g<br>(median: 134 ng/g)                  | N/A                                                                                           | PFCAs: 90.3-672.ng/g<br>(median: 134 ng/g)    | 17          |
| 2014, US                                        | 2007-2011                         | Children's uniform (13)                                 | PFCAs + PFSAs: ND-976 ng/g (median: 116 ng/g)               | N/A                                                                                           | PFCAs + PFSAs: ND-976 ng/g (median: 116 ng/g) | 18          |
| 2015, Denmark                                   | 2015*                             | Children products (15) prescreening with total fluorine | PFCAs: 0.10-45.30                                           | 6:2 FTOH: 0.02-83.05<br>8:2 FTOH: 6.52-264.99<br>10:2 FTOH: 1.83-54.54<br>ΣFT(M)AC: 0.06-6.46 |                                               | 14          |
| 2016 Thailand                                   | 2016*                             | Body contact Textile (17)                               | PFOA:0.02-0.61 (mean: 0.18)<br>PFOS:0.31-14.14 (mean: 2.74) | N/A                                                                                           |                                               | 19          |
| 2017, US                                        | 2015                              | Children clothing (2)                                   | ND                                                          | 6:2 FTOH: ND-7.0<br>8:2 FTOH: 72-130<br>10:2FTOH: 37-42                                       |                                               | 20          |
| 2017, US                                        | 2015                              | Outdoor clothing (5)                                    | 0.66-55.92                                                  | 6:2 FTOH: ND-14000<br>8:2 FTOH: 22-990<br>10:2 FTOH: ND -490                                  |                                               | 20          |
| 2020, Sweden                                    | 2020*                             | Outdoor clothing (13)                                   | ND-82.9                                                     | 6:2 FTOH: ND-120<br>6:2 FTMAC: 4.1-180                                                        |                                               | 21          |

|                   |             |                                                    |                                                                 |                                                                                                                                         |                                                                     |            |
|-------------------|-------------|----------------------------------------------------|-----------------------------------------------------------------|-----------------------------------------------------------------------------------------------------------------------------------------|---------------------------------------------------------------------|------------|
| 2020, US          | 2016-2020   | Infant clothing (59) and functional textiles (101) | ND- 63.7 (ND -285 ng/g) (mean: 3.18 (14.2 ng/g))                | N/A                                                                                                                                     |                                                                     | 22         |
| 2020, US          | 2020        | Infant clothing (86)                               | Median: 3.42 ng/g                                               | 6:2 FTOH (Median: 27.1 ng/g)                                                                                                            |                                                                     | 23         |
| 2021, US & Canada | 2020 & 2021 | Children's products (57)                           | 0.004-8.18 (0.021– 48.8 ng/g) (mean: 0.67 (2.99 ng/g))          | 6:2 FTOH: ND – 38100(ND – 153000 ng/g) (median: 55.31 (355 ng/g))<br>6:2 FTMAc: ND – 343.2 (ND – 1020.0 ng/g) (median: 28.2 (219 ng/g)) | 0.250-153000 ng/g (median:117 ng/g)<br>0.0272-38100, (median: 24.0) | This study |
| 2021, US & Canada | 2020 & 2021 | School uniform (25)                                | 0.10-34.6 ng/g (median: 2.30 ng/g)<br>0.014-7.98 (median:0.544) | 6:2 FTOH ND-153000 ng/g (median:445 ng/g) ND-38100 (median: 78.0)<br>6:2 FTMAc: ND-1020 ng/g (median: 132 ng/g) ND-340 (median: 48.2)   | 0.283-153000 ng/g (median:728 ng/g)<br>0.041-38100, (median: 178)   | This study |

**Table S19.** Input data for Substance Flow Analysis of PFAS found in school uniforms purchased with description, and estimates of low, middle, and high values, and source of information.

| Parameter                             | Description                                                       | Parameter Values Used |           |           | Source                                                                                      |
|---------------------------------------|-------------------------------------------------------------------|-----------------------|-----------|-----------|---------------------------------------------------------------------------------------------|
|                                       |                                                                   | Low                   | Middle    | High      |                                                                                             |
| C <sub>functional polymeric</sub>     | Concentration of functional polymeric PFAS in school uniforms     | 0.15%                 | 0.30%     | 0.45%     | Audenaert et al. <sup>10</sup> ,<br>Sayed & Dabhi, <sup>11</sup><br>Choudhury <sup>12</sup> |
| C <sub>no PFAS polymeric</sub>        | Concentration of polymeric PFAS in untreated school uniforms      | 0%                    | 0%        | 0%        | N/A                                                                                         |
| C <sub>functional non-polymeric</sub> | Concentration of functional non-polymeric PFAS in school uniforms | 3.52E-03%             | 1.05E-02% | 1.25E-02% | TOP Assay, Table 15                                                                         |
| C <sub>no PFAS non-polymeric</sub>    | Concentration of non-polymeric PFAS in untreated school uniforms  | 0%                    | 0%        | 0%        | N/A                                                                                         |
| % <sub>functional</sub>               | Percent of school uniforms with functional PFAS                   | 1%                    | 6%        | 16%       | Calculated                                                                                  |
| % <sub>no PFAS</sub>                  | Percent of school uniforms with no PFAS                           | 99%                   | 94%       | 84%       | Calculated                                                                                  |

**Table S20.** Values used to estimate the mass of school uniforms purchased in a given year between 2019 and 2021.

| Country | Description                 | Values Used |        |       | Units                                 | Source                            |
|---------|-----------------------------|-------------|--------|-------|---------------------------------------|-----------------------------------|
|         |                             | Low         | Middle | High  |                                       |                                   |
| US      | % children                  | 16          | 26     | 36    | Percent                               | Coresight Research <sup>4</sup>   |
|         | Population                  | 62,377,000  |        |       | Persons                               | United Nations <sup>5</sup>       |
|         | Number of items             | 2           | 6      | 10    | Number of items purchased/person/year | Assumed                           |
|         | Weight of garment           | 125         | 166    | 202   | Grams                                 | This study                        |
|         | $M_{\text{school uniform}}$ | 249         | 1,610  | 4,521 | Tonnes                                | Calculated                        |
| Canada  | % children                  | 16          | 26     | 36    | Percent                               | Assume same as US                 |
|         | Population                  | 6,217,568   |        |       | Persons                               | Government of Canada <sup>6</sup> |
|         | Number of items             | 2           | 6      | 10    | Number of items purchased/person/year | Assumed                           |
|         | Weight of garment           | 125         | 166    | 202   | Grams                                 | This study                        |
|         | $M_{\text{school uniform}}$ | 249         | 1,610  | 4,521 | Tonnes                                | Calculated                        |

**Table S21:** Additional PFAS Flows illustrated in Figure S3

| <b>Flow Designation</b>    | <b>Description</b>                                                                                             |
|----------------------------|----------------------------------------------------------------------------------------------------------------|
| $F_1$                      | Flow of PFAS in children's school uniform sales.                                                               |
| $F_2$                      | Flow of PFAS in discarded school uniforms                                                                      |
| $F_3$                      | Flow of PFAS in littered infants' textiles                                                                     |
| $F_4$                      | Flow of PFAS in recycled children's school uniforms                                                            |
| $F_{4,1}$                  | Flow of PFAS from recycled children's school uniforms that are recycled back into uniforms                     |
| $F_{4,2}$                  | Flow of PFAS from recycled children's school uniforms that are recycled into other materials                   |
| $F_{4,3}$                  | Flow of PFAS from used children's school uniforms that are resold locally at secondhand shops                  |
| $F_{4,4}$                  | Flow of PFAS from used children's school uniforms that are exported                                            |
| $F_{4,5}$                  | Flow of PFAS from recycled children's school uniforms intended for recycling but ultimately landfilled         |
| $F_{4,6}$                  | Flow of PFAS from children's school uniforms which is released to the environment during the recycling process |
| $F_5$                      | Flow of PFAS from incinerated children's school uniforms                                                       |
| $F_6$                      | Flow of PFAS in landfilled children's school uniforms                                                          |
| $F_{6 \text{ Michigan}}$   | Flow of PFAS in landfilled children's school uniforms sent to Michigan from Canada                             |
| $F_{\text{SU}}$            | Flow of PFAS produced which are used in children's school uniforms                                             |
| $F_{\text{SU storage}}$    | Flow of PFAS from children's school uniforms stored for long periods                                           |
| $F_{\text{Production}}$    | Flow of PFAS released during the production of children's school uniforms                                      |
| $F_{\text{shedding}}$      | Flow of PFAS from children's school uniform fiber shedding directly into environment                           |
| $F_{\text{Intake}}$        | Flow of PFAS from children's school uniforms ingested or absorbed into the skin                                |
| $F_{\text{drying}}$        | Flow of PFAS released to the environment during machine drying                                                 |
| $F_{\text{Human Storage}}$ | Flow of PFAS bioaccumulated due to children's school uniforms                                                  |
| $F_{\text{Human WWTP}}$    | Flow of PFAS from children's school uniforms eliminated in feces and urine by humans and sent to WWTP          |
| $F_{\text{Bio}}$           | Flow of PFAS from WWTP biosolids                                                                               |
| $F_{\text{WWTP}}$          | Flow of PFAS in WWTP effluent from children's school uniforms                                                  |
| $F_{\text{influent}}$      | Flow of PFAS from washing to WWTP                                                                              |
| $F_{\text{Bio to env}}$    | Flow of PFAS from biosolids into the environment                                                               |
| $F_{\text{litter}}$        | Flow of PFAS contained in littered children's school uniforms                                                  |
| $F_{\text{Incineration}}$  | Flow of PFAS released to environment via incineration of children's school uniforms                            |
| $F_{\text{Destruction}}$   | Flow of PFAS permanently destroyed via incineration                                                            |
| $F_{\text{Leachate}}$      | Flow of PFAS from landfill leachate sent to WWTP                                                               |

**Table S22.** Description of relevance of each flow to understanding the movement of PFAS added to school uniforms through the environment.

| Flow Designation           | Motivation/Description                                                                                                                                                                                                                                                                                                                                                                                                                                                                                                                                        |
|----------------------------|---------------------------------------------------------------------------------------------------------------------------------------------------------------------------------------------------------------------------------------------------------------------------------------------------------------------------------------------------------------------------------------------------------------------------------------------------------------------------------------------------------------------------------------------------------------|
| F <sub>1</sub>             | PFAS may be added to textiles intentionally for stain, water, dirt, and/or grease resistance or unintentionally through contamination. <sup>3, 24</sup>                                                                                                                                                                                                                                                                                                                                                                                                       |
| F <sub>2</sub>             | We assumed that a portion of PFAS remain in textiles after use and will enter the end of life pathway.                                                                                                                                                                                                                                                                                                                                                                                                                                                        |
| F <sub>3</sub>             | We assumed that PFAS in littered school uniforms is likely a negligible flow.                                                                                                                                                                                                                                                                                                                                                                                                                                                                                 |
| F <sub>4</sub>             | We assumed that PFAS can remain in textiles sent for recycling.                                                                                                                                                                                                                                                                                                                                                                                                                                                                                               |
| F <sub>4.1</sub>           | 20% of recyclable textiles are reprocessed into fiber and used in the manufacturing of new products. <sup>25, 26</sup>                                                                                                                                                                                                                                                                                                                                                                                                                                        |
| F <sub>4.2</sub>           | 30% of recyclable textiles are reprocessed into industrial polishing/wiping cloths. <sup>25, 26</sup>                                                                                                                                                                                                                                                                                                                                                                                                                                                         |
| F <sub>4.3</sub>           | 20% of recyclable textiles are resold at local (i.e. within the same country) second-hand stores. <sup>25, 26</sup>                                                                                                                                                                                                                                                                                                                                                                                                                                           |
| F <sub>4.4</sub>           | 25% of recyclable textiles are exported and sold abroad. <sup>25, 26</sup>                                                                                                                                                                                                                                                                                                                                                                                                                                                                                    |
| F <sub>4.5</sub>           | 5% of recyclable textiles are intended for recycling but are ultimately sent to landfill. <sup>25, 26</sup>                                                                                                                                                                                                                                                                                                                                                                                                                                                   |
| F <sub>4.6</sub>           | Textiles are either pulled into fibers or shredded during the recycling process. <sup>27,31</sup> Air emissions during the shredding process can lead to airborne PFAS release. <sup>28,28</sup>                                                                                                                                                                                                                                                                                                                                                              |
| F <sub>5</sub>             | In Canada, approximately 3% of waste requiring final disposal is incinerated. <sup>29</sup> In the U.S., the EPA reported that the total municipal solid waste combusted with energy recovery by material for clothing and footwear was 2,004,878 tonnes in 2018. <sup>30</sup> We assumed that a portion of PFAS-treated textiles are sent to incineration.                                                                                                                                                                                                  |
| F <sub>6</sub>             | The Canadian government estimates that 9,475,471 tonnes of waste was landfilled in Ontario in 2016, and that textiles account of 1.4% of overall Canadian residual municipal solid waste disposal. <sup>31</sup> In 2018, the U.S. estimate of the total municipal solid waste landfill by material for clothing and footwear was 82,28,166 tonnes, and that textiles in general accounted for 7.7% of all municipal solid waste landfilled. <sup>32</sup> Michigan estimates that textiles and leather constituted 4.7% (3.8-5.5%) of municipal solid waste. |
| F <sub>6 Michigan</sub>    | A portion of waste generated in Canada is sent to Michigan for landfilling. <sup>33</sup> We assumed that a portion of PFAS-treated textiles are sent to Michigan landfills.                                                                                                                                                                                                                                                                                                                                                                                  |
| F <sub>SU</sub>            | A portion of PFAS production is used in the textile industry. In fact, the US EPA reported that textiles and apparel accounted for 50% of fluorotelomer and associated side-chain fluoropolymer use in 2006. <sup>28, 34</sup>                                                                                                                                                                                                                                                                                                                                |
| F <sub>SU storage</sub>    | We assumed that a portion of school uniforms are kept in storage prior to use, whether in warehouses, department stores, etc.                                                                                                                                                                                                                                                                                                                                                                                                                                 |
| F <sub>Production</sub>    | PFAS may be released to the environment during PFAS production, whether to air, water, and/or land. <sup>13, 35</sup>                                                                                                                                                                                                                                                                                                                                                                                                                                         |
| F <sub>shedding</sub>      | Microfiber shedding can occur during wearing and washing processes <sup>36, 37</sup> . PFAS thus may enter the environment through fiber shedding processes.                                                                                                                                                                                                                                                                                                                                                                                                  |
| F <sub>Intake</sub>        | Direct contact of clothing with skin is a route of chemical exposure through dermal absorption, and has been identified as a critical human exposure pathway for PFAS. <sup>23, 38,40,41</sup>                                                                                                                                                                                                                                                                                                                                                                |
| F <sub>drying</sub>        | Microfibers shed during the electric drying process can be released directly to the environment through dryer vents. <sup>39, 40</sup> PFAS thus may enter the environment through fiber shedding during clothing drying.                                                                                                                                                                                                                                                                                                                                     |
| F <sub>Human Storage</sub> | Numerous species of PFAS have been identified as bioaccumulative in humans and other organisms. <sup>41</sup>                                                                                                                                                                                                                                                                                                                                                                                                                                                 |

|                           |                                                                                                                                                                                                                                                                                                         |
|---------------------------|---------------------------------------------------------------------------------------------------------------------------------------------------------------------------------------------------------------------------------------------------------------------------------------------------------|
| $F_{\text{Human WWTP}}$   | PFAS contained in the human body can be excreted via urine, <sup>42, 43</sup> which may be a minor flow to wastewater treatment plants, given that fluorochemicals have previously been identified in wastewater influent. <sup>44, 45</sup>                                                            |
| $F_{\text{Bio}}$          | Biosolids produced during the wastewater treatment process may contain residual PFAS. <sup>46</sup>                                                                                                                                                                                                     |
| $F_{\text{WWTP}}$         | Wastewater treatment plants are well-known sources of PFAS emissions directly to the environment, as they are inefficiently removed during treatment processes. <sup>35, 37</sup>                                                                                                                       |
| $F_{\text{influent}}$     | Microfibers released during machine washing can enter wastewater influent <sup>36, 37</sup> and thus present a flow for PFAS originating in school uniforms.                                                                                                                                            |
| $F_{\text{Bio to env}}$   | Biosolids applied to agricultural lands as fertilizer may present an exposure of PFAS to the environment. <sup>46</sup>                                                                                                                                                                                 |
| $F_{\text{litter}}$       | We assume that PFAS originating from littered school uniforms is likely a negligible flow, and therefore exposure to the environment is also likely minimal.                                                                                                                                            |
| $F_{\text{Incineration}}$ | Incomplete destruction of PFAS during incineration processes can result in emission of smaller PFAS and other volatile compounds, leading to environmental contamination. <sup>47, 48</sup>                                                                                                             |
| $F_{\text{Destruction}}$  | Incineration at high enough temperatures is used to “thermally mineralize” fluorinated polymers in textiles. <sup>28</sup> However, the effectiveness of employing incineration (high temperature chemical breakdown) as a final destruction pathway for PFAS is not well understood. <sup>48, 49</sup> |
| $F_{\text{Leachate}}$     | Landfill leachate is a known source of PFAS, as they are routinely detected with short-chain PFAS being the most abundant. <sup>28</sup>                                                                                                                                                                |

**Table S23.** Estimate Daily Intake of PFAS via dermal absorption based on the total targeted PFAS concentration measured in these products.

| Sample ID    | EDI derm,<br>ng/kg bw/ day |
|--------------|----------------------------|
| UOT-IP-4b    | 2.32                       |
| UOT-IP-5a    | 5.56                       |
| UOT-IP-6b    | 0.61                       |
| UOT-2-IP-12a | 2.80                       |
| UOT-2-IP-13a | 2.91                       |
| UOT-IP-US-15 | 0.23                       |
| UOT-IP-US-16 | 0.05                       |
| UOT-IP-US-17 | 0.0005                     |
| UOT-IP-US-18 | 0.0002                     |
| UOT-IP-US-19 | 0.0009                     |
| UOT-IP-US-20 | 0.74                       |
| UOT-IP-US-21 | 2.57                       |
| UOT-IP-US-22 | 1.54                       |
| UOT-IP-US-23 | 1.85                       |
| UOT-IP-US-24 | 1.20                       |
| UOT-IP-US-25 | 95.3                       |
| UOT-IP-US-26 | 0.0004                     |
| UOT-IP-US-27 | 23.4                       |
| UOT-IP-US-28 | 1.03                       |
| UOT-IP-US-29 | 26.9                       |
| UOT-IP-US-30 | 0.39                       |
| UOT-IP-US-31 | 0.42                       |
| UOT-IP-US-32 | 0.14                       |
| UOT-IP-US-33 | 222                        |
| UOT-IP-US-34 | 0.003                      |
| Median       | 1.03                       |

|                                               | CAN<br>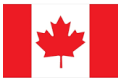 | US<br>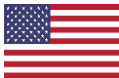 | Total |
|-----------------------------------------------|------------------------------------------------------------------------------------------|------------------------------------------------------------------------------------------|-------|
| Products                                      | 38                                                                                       | 34                                                                                       | 72    |
| Samples                                       | 83                                                                                       | 51                                                                                       | 134   |
| PIGE                                          | 83                                                                                       | 51                                                                                       | 134   |
| Targeted analysis by MS<br>(samples/products) | 23/23                                                                                    | 51/34                                                                                    | 74/57 |

**Figure S1.** Summary of sampling scheme identifying the number of products purchased, the number of samples generated from the products and the total number of samples analyzed with each technique.

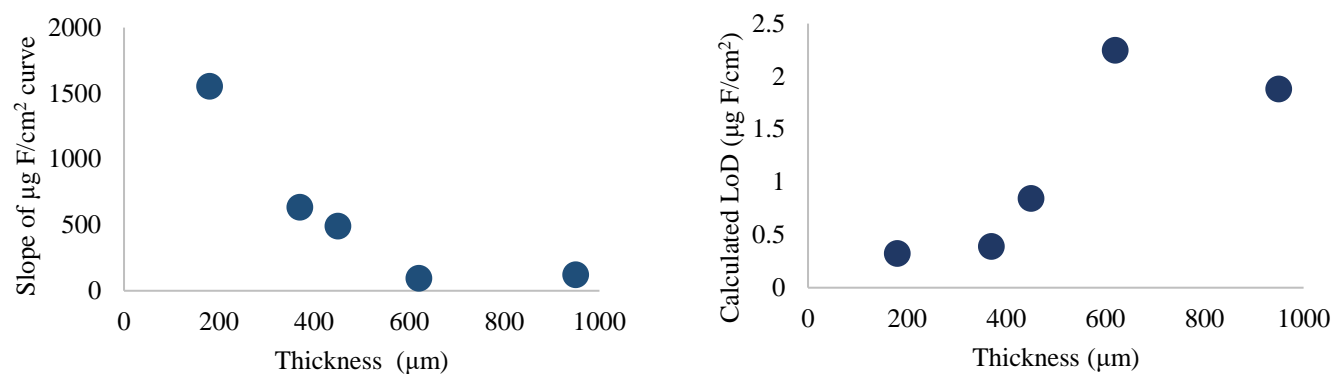

**Figure S2** Relationship between material thickness and the slope of a calibration curve generated using that material (left) and the relationship between material thickness and the LoD determined from a calibration curve generated using that material (right).

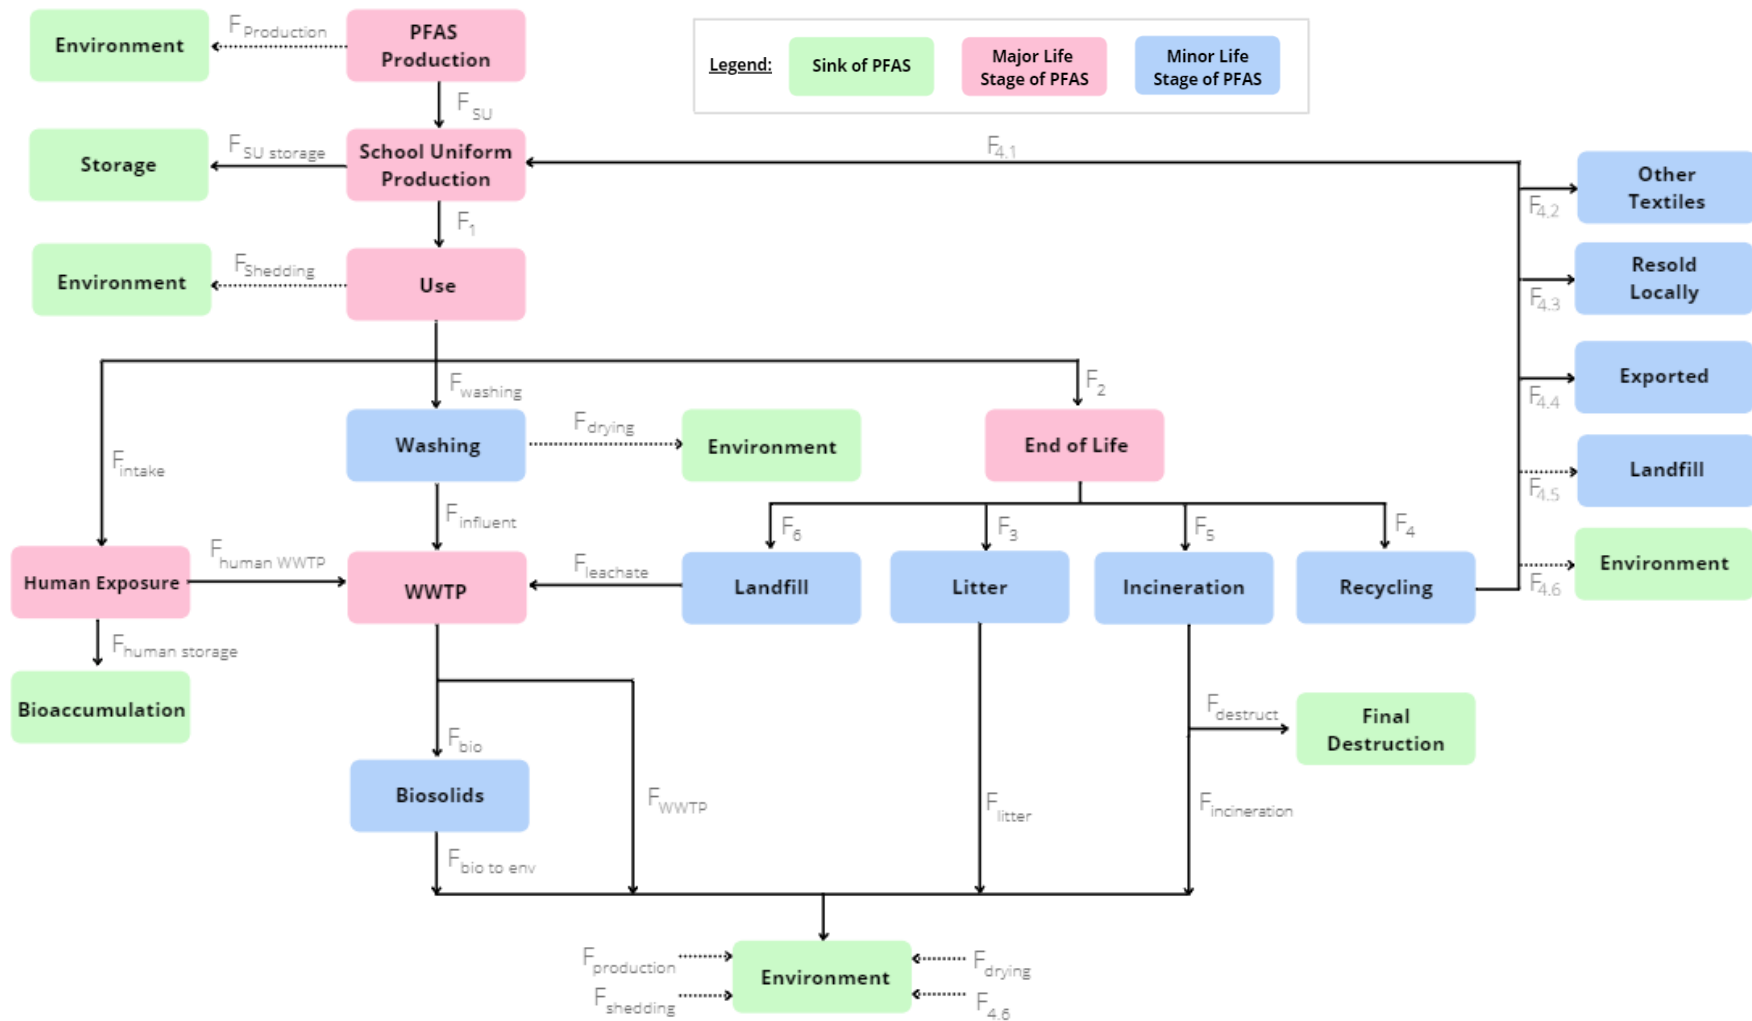

**Figure S3.** Substance flow analysis flow chart.

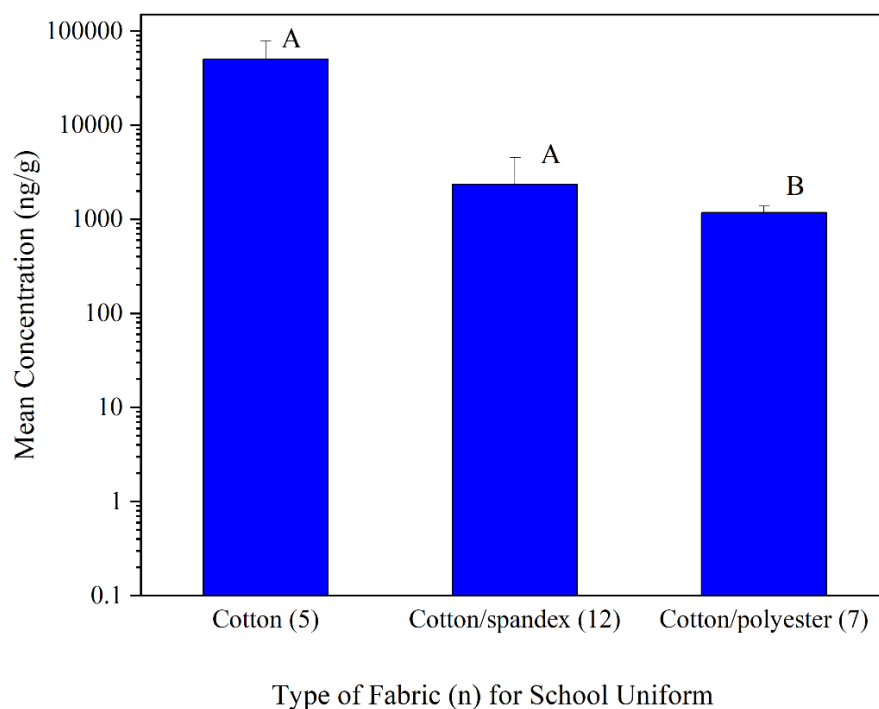

**Figure S4.** Mean (with standard errors) total targeted PFAS concentrations (ng/g) in different fabric types for school uniforms. Numbers in the bracket represent the number of samples. The letters represent the results of Kruskal-Wallis ANOVA; the concentrations are ranked from high to low in alphabetic order; the bars sharing the same letters are not significantly different at  $p < 0.05$ .

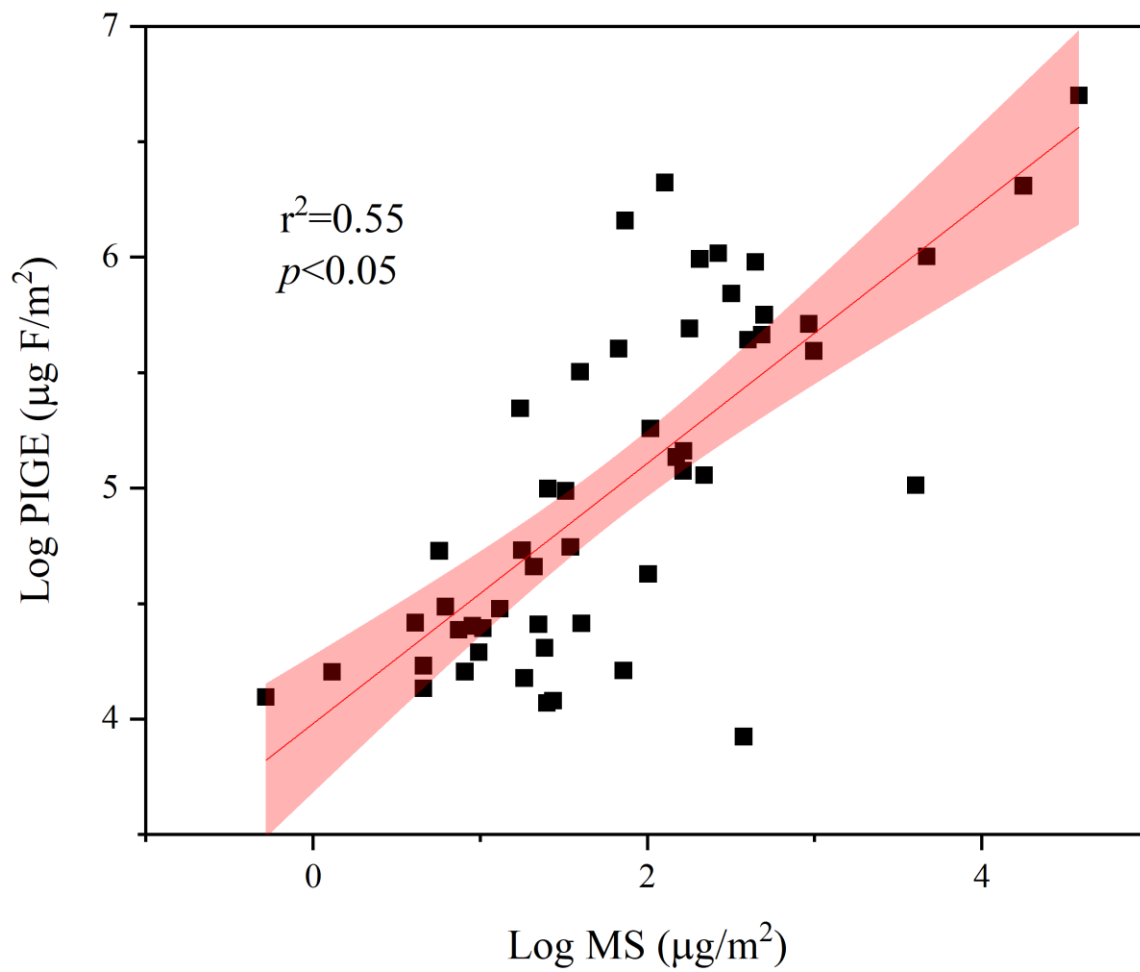

**Figure S5.** Correlation between total fluorine (µg F/m²) by PIGE and total targeted PFAS (µg/m²) by MS

## References

- (1) Van der Voet, E. Substance flow analysis methodology. In *A handbook of industrial ecology*, Ayres, R. U.; Ayres, L. W., Eds. Edward Elgar Publishing: Cheltenham, UK: 2002; pp 91-101.
- (2) Minet, L.; Wang, Z.; Shalin, A.; Bruton, T. A.; Blum, A.; Peaslee, G. F.; Schwartz-Narbonne, H.; Venier, M.; Whitehead, H.; Wu, Y.; Diamond, M. L. Use and Release of Per- And Polyfluoroalkyl Substances (PFAS) in Consumer Food Packaging in U.S. and Canada (submitted). *J. Hazard. Mater. Lett.* **2022**.
- (3) Gluge, J.; Scheringer, M.; Cousins, I. T.; DeWitt, J. C.; Goldenman, G.; Herzke, D.; Lohmann, R.; Ng, C. A.; Trier, X.; Wang, Z. An overview of the uses of per- and polyfluoroalkyl substances (PFAS). *Environ. Sci. Process Impacts* **2020**, 22, (12), 2345-2373.
- (4) Coresight Research. Back-to-School: Share of Children Wearing School Uniforms in the United States from 2008 to 2018. <https://www.statista.com/statistics/896612/share-of-children-wearing-school-uniforms-us/> (accessed October 05, 2021).
- (5) UN (United Nations). *World Population Prospects 2019*; 2019, <https://population.un.org/wpp/Download/Standard/Population/> (accessed October 15, 2021).
- (6) Statistics Canada. Population estimates on July 1st, by age and sex. <https://www150.statcan.gc.ca/t1/tbl1/en/tv.action?pid=1710000501> (accessed Access Date)
- (7) Mumtaz, M.; Bao, Y.; Li, W.; Kong, L.; Huang, J.; Yu, G. Screening of textile finishing agents available on the Chinese market: An important source of per- and polyfluoroalkyl substances to the environment. *Front. Environ. Sci. Eng.* **2019**, 13, (5).
- (8) Lassen, C.; Jensen, A. A.; Warming, M. *Alternatives to Perfluoroalkyl and Polyfluoroalkyl Substances (PFAS) in Textiles*. The Danish Environmental Protection Agency 2015, <https://www2.mst.dk/Udgiv/publications/2015/05/978-87-93352-16-2.pdf>
- (9) Sullivan, H. Dyeing, Printing & Finishing: PFAS - A Textile Perspective. <https://www.textileworld.com/textile-world/features/2021/05/dyeing-printing-finishing-pfas-a-textile-perspective/> (accessed August 18, 2021).
- (10) Audenaert, F.; Lens, H.; Rolly, D.; Vander Elst, P. Fluorochemical Textile Repellents—Synthesis and Applications: A 3M Perspective. *The Journal of The Textile Institute* **1999**, 90, (3), 76-94.
- (11) Sayed, U.; Dabhi, P. 6 - Finishing of textiles with fluorocarbons. In *Waterproof and Water Repellent Textiles and Clothing*, Williams, J., Ed. Woodhead Publishing: 2014; pp 139-152. <https://doi.org/10.1016/B978-0-08-101212-3.00006-X>.
- (12) Roy Choudhury, A. K. 7 - *Repellent finishes*. Woodhead Publishing: 2017; <https://doi.org/10.1016/B978-0-08-100646-7.00007-2p> 149-194. <https://doi.org/10.1016/B978-0-08-100646-7.00007-2>.
- (13) Lohmann, R.; Cousins, I. T.; DeWitt, J. C.; Gluge, J.; Goldenman, G.; Herzke, D.; Lindstrom, A. B.; Miller, M. F.; Ng, C. A.; Patton, S.; Scheringer, M.; Trier, X.; Wang, Z. Are Fluoropolymers Really of Low Concern for Human and Environmental Health and Separate from Other PFAS? *Environ. Sci. Technol.* **2020**, 54, (20), 12820-12828.
- (14) Danish ministry of the Environment. *Polyfluoroalkyl substances (PFASs) in textiles for children-Survey of chemical substances in consumer products No. 136, 2015*; Danish Environmental Protection Agency: Copenhagen, Denmark, 2015, <https://www2.mst.dk/Udgiv/publications/2015/04/978-87-93352-12-4.pdf> (accessed October 20, 2021).
- (15) Hill, P. J.; Taylor, M.; Goswami, P.; Blackburn, R. S. Substitution of PFAS chemistry in outdoor apparel and the impact on repellency performance. *Chemosphere* **2017**, 181, 500-507.
- (16) Berger, U.; Herzke, D. Per- and polyfluorinated alkyl substances (PFAS) extracted from textile samples. *Organohalogen Compounds* **2006**, 68, 2023-2026.
- (17) Guo, Z.; Liu, X.; Krebs, K. A.; Roache, N. F. *Perfluorocarboxylic acid content in 116 articles of commerce*; US Environmental Protection Agency: Washington, DC, 2009, [https://cfpub.epa.gov/si/si\\_public\\_record\\_report.cfm?Lab=NRMRL&dirEntryId=206124](https://cfpub.epa.gov/si/si_public_record_report.cfm?Lab=NRMRL&dirEntryId=206124) (accessed June 15, 2021).

- (18) Liu, X.; Guo, Z.; Krebs, K. A.; Pope, R. H.; Roache, N. F. Concentrations and trends of perfluorinated chemicals in potential indoor sources from 2007 through 2011 in the US. *Chemosphere* **2014**, 98, 51-7.
- (19) Supreeyasunthorn, P.; Boontanon, S. K.; Boontanon, N. Perfluorooctane sulfonate (PFOS) and perfluorooctanoic acid (PFOA) contamination from textiles. *Journal of Environmental Science and Health, Part A* **2016**, 51, (6), 472-477.
- (20) Robel, A. E.; Marshall, K.; Dickinson, M.; Lunderberg, D.; Butt, C.; Peaslee, G.; Stapleton, H. M.; Field, J. A. Closing the Mass Balance on Fluorine on Papers and Textiles. *Environ. Sci. Technol.* **2017**, 51, (16), 9022-9032.
- (21) van der Veen, I.; Hanning, A. C.; Stare, A.; Leonards, P. E. G.; de Boer, J.; Weiss, J. M. The effect of weathering on per- and polyfluoroalkyl substances (PFASs) from durable water repellent (DWR) clothing. *Chemosphere* **2020**, 249, 126100.
- (22) Zhu, H.; Kannan, K. Total oxidizable precursor assay in the determination of perfluoroalkyl acids in textiles collected from the United States. *Environ. Pollut.* **2020**, 265, (Pt B), 114940.
- (23) Zheng, G.; Salamova, A. Are Melamine and Its Derivatives the Alternatives for Per- and Polyfluoroalkyl Substance (PFAS) Fabric Treatments in Infant Clothes? *Environ. Sci. Technol.* **2020**, 54, (16), 10207-10216.
- (24) CEC (Commission for Environmental Cooperation). *Furthering the Understanding of the Migration of Chemicals from Consumer Products – A Study of Per- and Polyfluoroalkyl Substances (PFASs) in Clothing, Apparel, and Children's Items*; Montreal, Canada: Commission for Environmental Cooperation, 2017, (accessed January 11, 2021).
- (25) Jay, P. Here's where your donated clothing really ends up. <https://www.cbc.ca/news/canada/ottawa/donated-clothing-where-it-ends-up-1.4662023> (accessed June 28, 2021).
- (26) SMART (Secondary Material and Recycled Textiles Association). How are textiles recycled? <https://www.smartasn.org/resources/frequently-asked-questions/> (accessed June 25, 2021).
- (27) LeBlanc, R. The Basics of Textile Recycling. <https://www.thebalancesmb.com/the-basics-of-recycling-clothing-and-other-textiles-2877780> (accessed October 19, 2021).
- (28) Thorpe, B. *Scoping Per-and Polyfluoroalkyl Substances Releases from the Recycling of Paper and Textiles and their Implications for the Great Lakes-St Lawrence River Ecosystem: Identifying Opportunities to Address Toxicity of Products in a Circular Economy*; Canadian Environmental Law Association: 2019, <https://cela.ca/wp-content/uploads/2019/10/Report-PFAS-Sept-2019.pdf> (accessed June 23, 2021).
- (29) Government of Canada. *Municipal solid waste management in Canada*; 2021, <https://www.canada.ca/en/environment-climate-change/services/managing-reducing-waste/municipal-solid/environment.html> (accessed).
- (30) US EPA (U.S. Environmental Protection Agency). *Sustainable Materials Management (SMM) - Materials and Waste Management in the United States Key Facts and Figures*; 2020, <https://edg.epa.gov/metadata/catalog/search/resource/details.page?uuid=C9310A59-16D2-4002-B36B-2B0A1C637D4E> (accessed March 11, 2021).
- (31) Government of Canada. *National waste characterization report : the composition of Canadian residual municipal solid waste.*; 2020, <https://publications.gc.ca/site/eng/9.884760/publication.html> (accessed March 11, 2021).
- (32) US EPA (U.S. Environmental Protection Agency). *Textiles: Material-Specific Data*; 2018, <https://www.epa.gov/facts-and-figures-about-materials-waste-and-recycling/textiles-material-specific-data> (accessed June 28, 2021).
- (33) Michigan Department of Environment, G. L., and Energy,. *Report of Solid Waste Landfilled in Michigan 2020*; 2021, [https://www.michigan.gov/egle/0,9429,7-135-3312\\_4123-47581--,00.html](https://www.michigan.gov/egle/0,9429,7-135-3312_4123-47581--,00.html) (accessed June 28, 2021).

- (34) US EPA (U.S. Environmental Protection Agency). *Long-chain perfluorinated chemicals (PFCs) action plan*; 2009, [https://www.epa.gov/sites/default/files/2016-01/documents/pfcs\\_action\\_plan1230\\_09.pdf](https://www.epa.gov/sites/default/files/2016-01/documents/pfcs_action_plan1230_09.pdf) (accessed June 23, 2021).
- (35) OECD (Organisation for Economic Cooperation and Development). *PFCs: outcome of the 2009 survey survey on the production, use and release of PFOS, PFAS, PFOA PFOA, their related substances products/mixtures containing these substances*; 2011, (accessed October 10, 2021).
- (36) Athey, S. N.; Adams, J. K.; Erdle, L. M.; Jantunen, L. M.; Helm, P. A.; Finkelstein, S. A.; Diamond, M. L. The Widespread Environmental Footprint of Indigo Denim Microfibers from Blue Jeans. *Environ. Sci. Technol. Lett.* **2020**, 7, (11), 840-847.
- (37) Carney Almroth, B. M.; Astrom, L.; Roslund, S.; Petersson, H.; Johansson, M.; Persson, N. K. Quantifying shedding of synthetic fibers from textiles; a source of microplastics released into the environment. *Environ. Sci. and Pollut. Res.* **2018**, 25, (2), 1191-1199.
- (38) Rovira, J.; Domingo, J. L. Human health risks due to exposure to inorganic and organic chemicals from textiles: A review. *Environ. Res.* **2019**, 168, 62-69.
- (39) Kapp, K. J.; Miller, R. Z. Electric clothes dryers: An underestimated source of microfiber pollution. *PLoS One* **2020**, 15, (10), e0239165.
- (40) Pirc, U.; Vidmar, M.; Mozer, A.; Krzan, A. Emissions of microplastic fibers from microfiber fleece during domestic washing. *Environ. Sci. and Pollut. Res.* **2016**, 23, (21), 22206-22211.
- (41) Sunderland, E. M.; Hu, X. C.; Dassuncao, C.; Tokranov, A. K.; Wagner, C. C.; Allen, J. G. A review of the pathways of human exposure to poly- and perfluoroalkyl substances (PFASs) and present understanding of health effects. *J. Expo. Sci. Environ. Epidemiol.* **2019**, 29, (2), 131-147.
- (42) Perez, F.; Nadal, M.; Navarro-Ortega, A.; Fabrega, F.; Domingo, J. L.; Barcelo, D.; Farre, M. Accumulation of perfluoroalkyl substances in human tissues. *Environ. Int.* **2013**, 59, 354-62.
- (43) Worley, R. R.; Moore, S. M.; Tierney, B. C.; Ye, X.; Calafat, A. M.; Campbell, S.; Woudneh, M. B.; Fisher, J. Per- and polyfluoroalkyl substances in human serum and urine samples from a residentially exposed community. *Environ. Int.* **2017**, 106, 135-143.
- (44) Schultz, M. M.; Higgins, C. P.; Huset, C. A.; Luthy, R. G.; Barofsky, D. F.; Field, J. A. Fluorochemical Mass Flows in a Municipal Wastewater Treatment Facility. *Environ. Sci. Technol.* **2006**, 40, (23), 7350-7357.
- (45) Tavasoli, E.; Luek, J. L.; Malley, J. P., Jr.; Mouser, P. J. Distribution and fate of per- and polyfluoroalkyl substances (PFAS) in wastewater treatment facilities. *Environ. Sci. Process Impacts* **2021**, 23, (6), 903-913.
- (46) Sepulvado, J. G.; Blaine, A. C.; Hundal, L. S.; Higgins, C. P. Occurrence and fate of perfluorochemicals in soil following the land application of municipal biosolids. *Environ. Sci. Technol.* **2011**, 45, (19), 8106-12.
- (47) California Environmental Protection Agency. *Product-Chemical Profile for Carpets and Rugs Containing Perfluoroalkyl or Polyfluoroalkyl Substances*; 2019, [https://dtsc.ca.gov/wp-content/uploads/sites/31/2020/02/Final\\_Product-Chemical\\_Profile\\_Carpets\\_Rugs\\_PFAss\\_a.pdf](https://dtsc.ca.gov/wp-content/uploads/sites/31/2020/02/Final_Product-Chemical_Profile_Carpets_Rugs_PFAss_a.pdf) (accessed October 19, 2021).
- (48) Environmental Working Group. Feeding the Waste Cycle: How PFAS ‘Disposal’ Perpetuates Contamination. <https://www.ewg.org/news-insights/news/feeding-waste-cycle-how-pfas-disposal-perpetuates-contamination> (accessed October 19, 2021).
- (49) Gullett, B.; Gillespie, A. *Per- and Polyfluoroalkyl Substances (PFAS): Incineration to Manage PFAS Waste Streams.* ; 2020, <https://www.epa.gov/chemical-research/technical-brief-and-polyfluoroalkyl-substances-pfas-incineration-manage-pfas> (accessed October 19, 2021).
